# Supplementary material
Source: PubMed Central journal article supplement (PMC6120736)
Supplement: ja8b05465_si_001.pdf [file ja8b05465_si_001.pdf]

## Dimethylcethrene: A Chiroptical Diradicaloid Photoswitch

Prince Ravat,<sup>†,‡</sup> Tomáš Šolomek,<sup>†</sup> Daniel Häussinger,<sup>†</sup> Olivier Blacque,<sup>§</sup> and Michal Juriček<sup>\*,†,§</sup>

<sup>†</sup>Department of Chemistry, University of Basel, St. Johannis-Ring 19, CH-4056 Basel, Switzerland

<sup>‡</sup>Institute of Organic Chemistry, University of Würzburg, Am Hubland, D-97074 Würzburg, Germany

<sup>§</sup>Department of Chemistry, University of Zurich, Winterthurerstrasse 190, CH-8057 Zurich, Switzerland

### Table of Contents

|                                                                          |            |
|--------------------------------------------------------------------------|------------|
| <b>S1. Synthesis</b>                                                     | <b>S2</b>  |
| <b>S2. UV–Vis Spectroscopy</b>                                           | <b>S7</b>  |
| Figure S1                                                                | S7         |
| Figure S2                                                                | S8         |
| Figure S3                                                                | S9         |
| Figure S4                                                                | S10        |
| Figure S5                                                                | S11        |
| Figure S6                                                                | S12        |
| Figure S7                                                                | S13        |
| <b>S3. HPLC Separation of Enantiomers of c-1b</b>                        | <b>S14</b> |
| Figure S8                                                                | S14        |
| <b>S4. Circular Dichroism (CD) Spectroscopy</b>                          | <b>S15</b> |
| Figure S9                                                                | S15        |
| <b>S5. X-Ray Crystallography</b>                                         | <b>S16</b> |
| Figure S10                                                               | S16        |
| Figure S11                                                               | S17        |
| Table S1                                                                 | S18        |
| <b>S6. DFT Calculations</b>                                              | <b>S19</b> |
| Table S2                                                                 | S19        |
| Table S3                                                                 | S19        |
| Table S4                                                                 | S19        |
| <b>S7. Assignment of <sup>1</sup>H and <sup>13</sup>C NMR Resonances</b> | <b>S20</b> |
| <b>S8. Copies of NMR Spectra</b>                                         | <b>S22</b> |
| <b>S9. Copies of HRMS Spectra</b>                                        | <b>S37</b> |
| <b>S10. Cartesian Coordinates</b>                                        | <b>S43</b> |

## S1. Synthesis

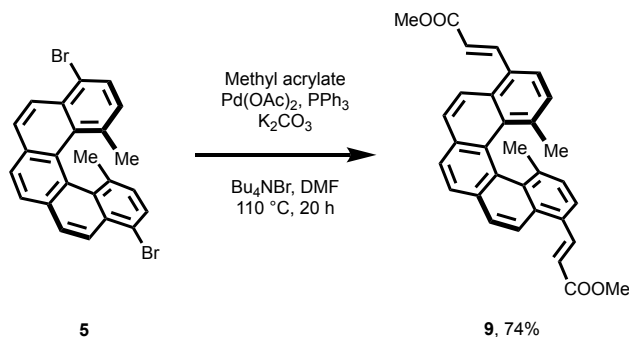

(±)-Dimethyl 3,3'-(10,11-dimethyldibenzo[*c,g*]phenanthrene-7,14-diyl)(2*E*,2'*E*)-diacrylate (**9**). A mixture of (±)-7,14-dibromo-10,11-dimethyldibenzo[*c,g*]phenanthrene (**5**; 0.35 g, 0.75 mmol), methyl acrylate (0.54 mL, 6.0 mmol), PPh<sub>3</sub> (0.12 g, 0.45 mmol), Pd(OAc)<sub>2</sub> (51 mg, 0.22 mmol), K<sub>2</sub>CO<sub>3</sub> (0.21 g, 1.5 mmol), tetrabutylammonium bromide (0.49 g, 1.5 mmol), and DMF (18 mL) was heated at 110 °C for 20 h under an argon atmosphere before it was poured into aqueous HCl (2 M) and extracted with CH<sub>2</sub>Cl<sub>2</sub>. The combined organic layers were washed with brine, dried over anhydrous Na<sub>2</sub>SO<sub>4</sub>, and filtered. After evaporation of the solvents, the residue was purified by column chromatography over silica gel using cyclohexane/ethyl acetate (7:3) as an eluent to afford the desired product (263 mg, 74%) as a pale yellow solid.

<sup>1</sup>H NMR (400 MHz, CD<sub>2</sub>Cl<sub>2</sub>, ppm): δ 8.69 (d, *J* = 15.7 Hz, 2H), 8.33 (d, *J* = 8.8 Hz, 2H), 8.10 (s, 2H), 8.02 (d, *J* = 8.8 Hz, 2H), 7.82 (d, *J* = 7.6 Hz, 2H), 7.11 (d, *J* = 7.6 Hz, 2H), 6.62 (d, *J* = 15.7 Hz, 2H), 3.86 (s, 6H), 0.92 (s, 6H).

<sup>13</sup>C NMR (101 MHz, CD<sub>2</sub>Cl<sub>2</sub>, ppm): δ 167.6, 142.2, 137.8, 132.9, 131.63, 131.55, 129.1, 128.9, 127.0, 126.8, 126.7, 125.1, 123.1, 120.2, 52.0, 22.8.

ESI-HRMS (*m/z*): calcd for C<sub>32</sub>H<sub>26</sub>O<sub>4</sub> + H<sup>+</sup> 475.1904, found 475.1907.

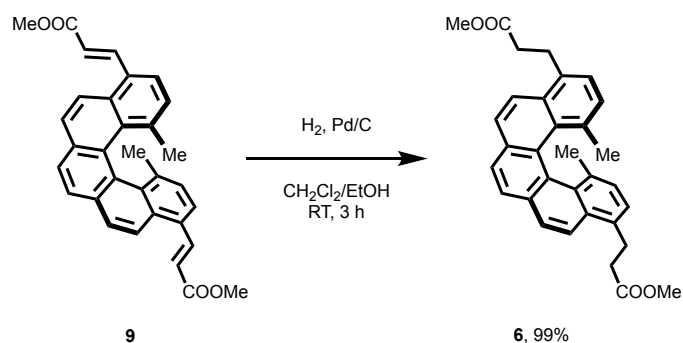

(±)-Dimethyl 3,3'-(10,11-dimethyldibenzo[*c,g*]phenanthrene-7,14-diyl)dipropionate (**6**). **9** (214 mg, 0.451 mmol) and Pd/C (48 mg, 10 wt. % palladium on carbon) were suspended in CH<sub>2</sub>Cl<sub>2</sub>/EtOH (40 mL, 1:1) and hydrogen gas was bubbled through the suspension for 30 min. The reaction mixture was then stirred at room temperature under a hydrogen atmosphere for 3 h before it was passed through

Celite® and concentrated in vacuum to afford the desired product (213 mg, 99%) as a white solid. The as-obtained product contained <5% of a side product (formed by over-reduction of two double bonds of the [5]helicene moiety), which could not be separated by column chromatography, and was thus used in the next step without further purification.

**<sup>1</sup>H NMR (400 MHz, CD<sub>2</sub>Cl<sub>2</sub>, ppm):** δ 8.16 (d, *J* = 8.8 Hz, 2H), 8.05 (s, 2H), 7.96 (d, *J* = 8.7 Hz, 2H), 7.37 (d, *J* = 7.4 Hz, 2H), 6.98 (d, *J* = 7.4 Hz, 2H), 3.68 (s, 6H), 3.58 (ddd, *J* = 14.8, 8.8, 6.8 Hz, 2H), 3.50 (ddd, *J* = 14.8, 8.8, 6.8 Hz, 2H), 2.86 (ddd, *J* = 15.8, 8.8, 6.8 Hz, 2H), 2.81 (ddd, *J* = 15.8, 8.8, 6.8 Hz, 2H), 0.79 (s, 6H).

**<sup>13</sup>C NMR (101 MHz, CD<sub>2</sub>Cl<sub>2</sub>, ppm):** δ 173.6, 134.2, 133.9, 132.9, 131.3, 131.2, 128.6, 127.2, 126.8, 126.4, 125.9, 123.0, 51.9, 36.1, 28.9, 22.2.

**ESI-HRMS (*m/z*):** calcd for C<sub>32</sub>H<sub>30</sub>O<sub>4</sub> + H<sup>+</sup> 479.2217, found 479.2219; calcd for C<sub>32</sub>H<sub>30</sub>O<sub>4</sub> + Na<sup>+</sup> 501.2036, found 501.2041.

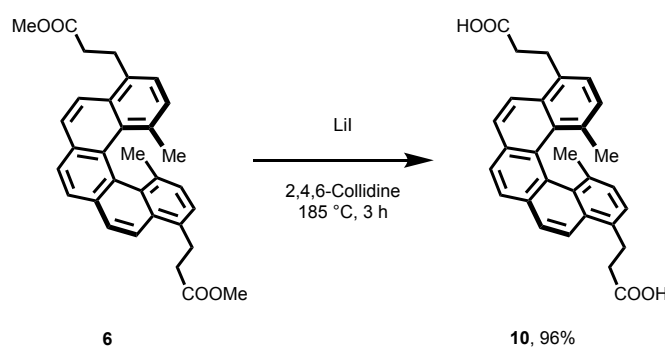

**(±)-3,3'-(10,11-Dimethyldibenzo[*c,g*]phenanthrene-7,14-diyl)dipropionic acid (10).** A mixture of **6** (211 mg, 0.441 mmol), lithium iodide (590 mg, 4.41 mmol), and 2,4,6-collidine (8 mL) was heated at 185 °C for 3 h under an argon atmosphere before it was cooled to room temperature and concentrated in vacuum. To the residue, aqueous HCl (20 mL, 2 M) was added and the precipitate that formed was filtered and washed with water to afford the desired product (190 mg, 96%) as a brown solid. The as-obtained product contained <10% of an impurity (most likely formed from the side product of the previous step) and was used in the next step without further purification.

**<sup>1</sup>H NMR (400 MHz, CD<sub>3</sub>COCD<sub>3</sub>, ppm):** δ 8.28 (d, *J* = 8.7 Hz, 2H), 8.14 (s, 2H), 8.07 (d, *J* = 8.7 Hz, 2H), 7.47 (d, *J* = 7.4 Hz, 2H), 7.01 (d, *J* = 7.4 Hz, 2H), 3.59 (ddd, *J* = 14.6, 8.5, 6.9 Hz, 2H), 3.52 (ddd, *J* = 14.6, 8.5, 6.9 Hz, 2H), 2.86 (partially overlapped with water signal; ddd, *J* = 15.8, 8.5, 7.0 Hz, 2H), 2.80 (partially overlapped with water signal; ddd, *J* = 15.8, 8.5, 7.0 Hz, 2H), 0.81 (s, 6H).

**<sup>13</sup>C NMR (101 MHz, CD<sub>3</sub>COCD<sub>3</sub>, ppm):** δ 174.0, 135.2, 133.9, 133.3, 131.9, 131.7, 129.1, 127.6, 127.4, 127.0, 126.5, 123.7, 36.1, 29.1, 22.4.

**ESI-HRMS (*m/z*):** calcd for C<sub>30</sub>H<sub>26</sub>O<sub>4</sub> + Na<sup>+</sup> 473.1723, found 473.1730.

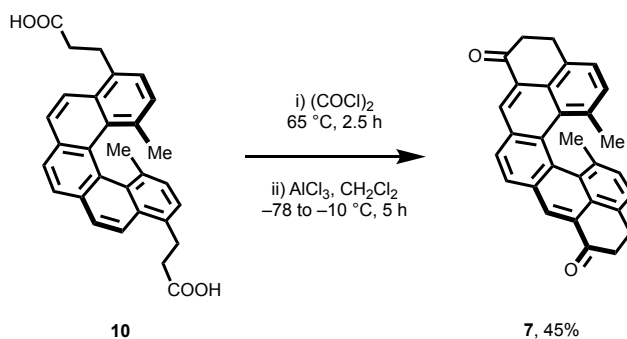

**(±)-13,14-Dimethyl-1,2,9,10-tetrahydrodibenzo[*pq,uv*]pentaphene-3,8-dione (7).** A solution of **10** (88 mg, 0.20 mmol) in oxalyl chloride (10 mL) was heated at 65 °C for 2.5 h before the excess of oxalyl chloride was removed under the reduced pressure. The crude product was dissolved in CH<sub>2</sub>Cl<sub>2</sub> (40 mL) and the solution was cooled to -78 °C. At this temperature, AlCl<sub>3</sub> (155 mg, 1.16 mmol) was added and the reaction mixture was allowed to warm to -10 °C over 5 h before it was poured onto ice and acidified with aqueous HCl (2 M). The organic layer was separated and the aqueous layer was extracted with CH<sub>2</sub>Cl<sub>2</sub>. The combined organic layers were washed with saturated NaHCO<sub>3</sub>, water, and brine, dried over anhydrous Na<sub>2</sub>SO<sub>4</sub>, and filtered. After evaporation of the solvents, the residue was purified by column chromatography over silica gel using CH<sub>2</sub>Cl<sub>2</sub> as an eluent to afford the desired product (36 mg, 45%) as a yellow solid.

**<sup>1</sup>H NMR (500 MHz, CD<sub>2</sub>Cl<sub>2</sub>, ppm):** δ 8.65 (s, 2H), 8.23 (s, 2H), 7.49 (d, *J* = 7.3 Hz, 2H), 7.14 (d, *J* = 7.4 Hz, 2H), 3.60 (ddd, *J* = 15.7, 7.3, 6.5 Hz, 2H), 3.52 (ddd, *J* = 15.7, 8.6, 6.1 Hz, 2H), 3.16 (ddd, *J* = 15.0, 8.6, 6.3 Hz, 2H), 3.02 (ddd, *J* = 15.4, 7.5, 6.0 Hz, 2H), 0.91 (s, 6H).

**<sup>13</sup>C NMR (101 MHz, CD<sub>2</sub>Cl<sub>2</sub>, ppm):** δ 198.8, 133.6, 132.6, 131.7, 131.3, 130.5, 129.73, 129.68, 129.66, 128.8, 126.4, 125.8, 39.3, 29.1, 22.4.

**ESI-HRMS (*m/z*):** calcd for C<sub>30</sub>H<sub>22</sub>O<sub>2</sub> + H<sup>+</sup> 415.1693, found 415.1690.

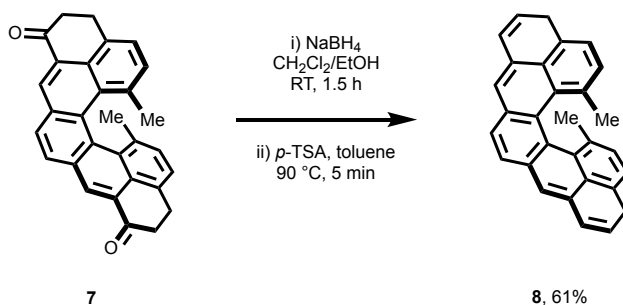

**(±)-13,14-Dimethyl-1,10-dihydrodibenzo[*pq,uv*]pentaphene (8).** A solution of **7** (30 mg, 0.072 mmol) and sodium borohydride (14 mg, 0.36 mmol) in CH<sub>2</sub>Cl<sub>2</sub>/EtOH (18 mL, 2:1) was stirred at room temperature for 90 min before the reaction was quenched by the addition of aqueous HCl (2 M). The



organic layer was separated and the aqueous layer was extracted with CH<sub>2</sub>Cl<sub>2</sub>. The combined organic layers were washed with saturated NaHCO<sub>3</sub>, water, and brine, dried over anhydrous Na<sub>2</sub>SO<sub>4</sub>, and filtered. Evaporation of the solvents gave the crude dihydroxy intermediate (21 mg, 70%) as a brown solid, which was not purified further. To a hot (90 °C) solution of this intermediate (20 mg, 0.048 mmol) in toluene (8 mL), *p*-toluenesulfonic acid monohydrate (*p*-TSA; 2.7 mg, 0.014 mmol) was added and the reaction mixture was heated at 90 °C for 5 min before it was cooled in an ice bath and passed through a pad of silica gel using toluene/hexane (1:1) as an eluent. Evaporation of the solvents afforded the desired product (16 mg, 87%; 61% over the two steps) as a brownish solid that is light-sensitive in air.

**<sup>1</sup>H NMR (500 MHz, CD<sub>2</sub>Cl<sub>2</sub>, ppm):** δ 7.82 (s, 2H), 7.37 (m, 2H), 7.30 (ddd, *J* = 7.5, 1.4, 1.4 Hz, 2H), 7.00 (dq, *J* = 7.5, 0.7 Hz, 2H), 6.81 (dddd, *J* = 9.7, 2.4, 2.0, 0.6 Hz, 2H), 6.21 (dddd, *J* = 9.8, 4.4, 3.8, 0.6 Hz, 2H), 4.18 (d(m), *J* = 25.2 Hz (sim. dddd, *J* = 25.2, 3.8, 2.4, 1.4 Hz), 2H), 4.09 (d(m), *J* = 25.4 Hz (sim. dddd, *J* = 25.4, 4.4, 2.0, 1.4 Hz), 2H), 0.97 (d, *J* = 0.9 Hz, 6H).

**<sup>13</sup>C NMR (126 MHz, CD<sub>2</sub>Cl<sub>2</sub>, ppm):** δ 133.0, 132.5, 132.3, 131.5, 130.8, 129.4, 128.9, 128.4, 128.0, 127.4, 126.37, 126.35, 122.0, 32.7, 22.4.

**ESI-HRMS (*m/z*):** calcd for C<sub>30</sub>H<sub>22</sub> – H<sup>+</sup> 381.1638, found 381.1641.

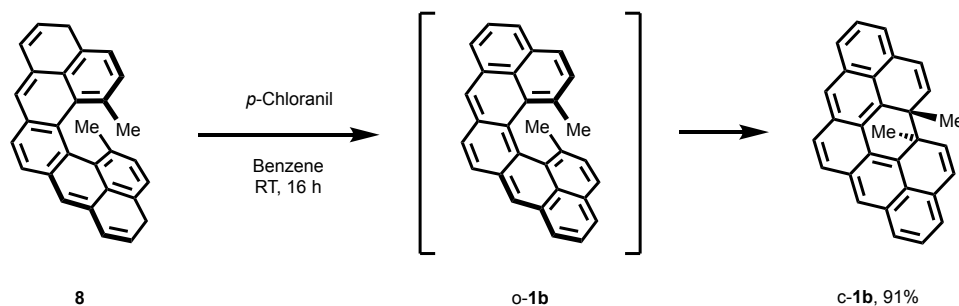

**(±)-(12a*R*,12b*R*)-12a,12b-Dimethyl-12a,12b-dihydrophenanthro[2,1,10,9,8,7-*pqrstuv*]pentaphene (c-1b).** To an argon-saturated solution of **8** (8 mg, 0.02 mmol) in benzene (2 mL), *p*-chloranil (9.9 mg, 0.04 mmol) was added and the mixture was stirred at room temperature in the dark for 16 h before it was passed through a pad of silica gel using toluene/hexane (1:1) as an eluent. Evaporation of the solvents afforded the desired product (6.8 mg, 91%) as a pale yellow solid.

**<sup>1</sup>H NMR (500 MHz, C<sub>6</sub>D<sub>6</sub>, ppm):** δ 7.80 (s, 2H), 7.59 (dd, *J* = 8.6, 1.1 Hz, 2H), 7.45 (s, 2H), 7.19 (dd, *J* = 8.4, 6.8 Hz, 2H), 6.94 (dd, *J* = 6.7, 1.1 Hz, 2H), 6.61 (d, *J* = 9.9 Hz, 2H), 6.27 (d, *J* = 9.9 Hz, 2H), 1.56 (s, 6H).

**<sup>13</sup>C NMR (101 MHz, C<sub>6</sub>D<sub>6</sub>, ppm):** δ 135.9, 133.2, 132.6, 132.1, 130.3, 128.2, 128.0, 127.7, 126.9, 126.7, 125.1, 124.7, 123.3, 45.6, 28.5.

**EI-HRMS (*m/z*):** calcd for C<sub>30</sub>H<sub>20</sub> 380.15595, found 380.15553.

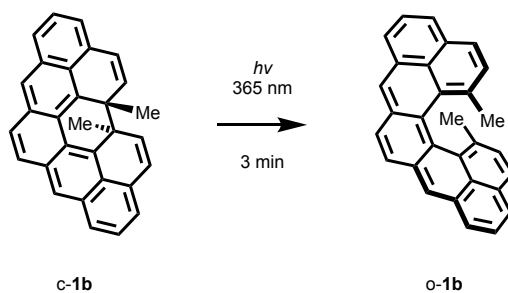

**13,14-Dimethyldibenzo[*pq,uv*]pentaphene (o-1b).** A solution of c-1b in C<sub>6</sub>D<sub>6</sub> (~0.6 mL, ~10<sup>-4</sup> M) was irradiated at 365 nm for 3 min, which generated o-1b in situ. This solution was used for acquiring the 1D and 2D NMR spectra for o-1b. In between the NMR measurements, the sample was irradiated again, to maximize the amount of o-1b, as it slowly undergoes thermal electrocyclization to c-1b.

**<sup>1</sup>H NMR (600 MHz, C<sub>6</sub>D<sub>6</sub>, ppm):** δ 7.24 (d, *J* = 8.1 Hz, 2H), 7.13 (d, *J* = 8.2 Hz, 2H), 7.07 (dd, *J* = 8.1, 7.2 Hz, 2H), 7.00 (dd, *J* = 7.2, 1.1 Hz, 2H), 6.68 (d, *J* = 8.2 Hz, 2H), 6.58 (s, 2H), 6.45 (s, 2H), 1.77 (s, 6H).

**<sup>13</sup>C NMR (From HSQC and HMBC (600 MHz), C<sub>6</sub>D<sub>6</sub>, ppm):** δ 138.3, 133.8, 133.5, 133.4 (2×), 132.0, 130.9, 130.3, 128.7, 127.2 (2×), 126.6, 125.0, 123.9, 22.6.

## S2. UV-Vis Spectroscopy

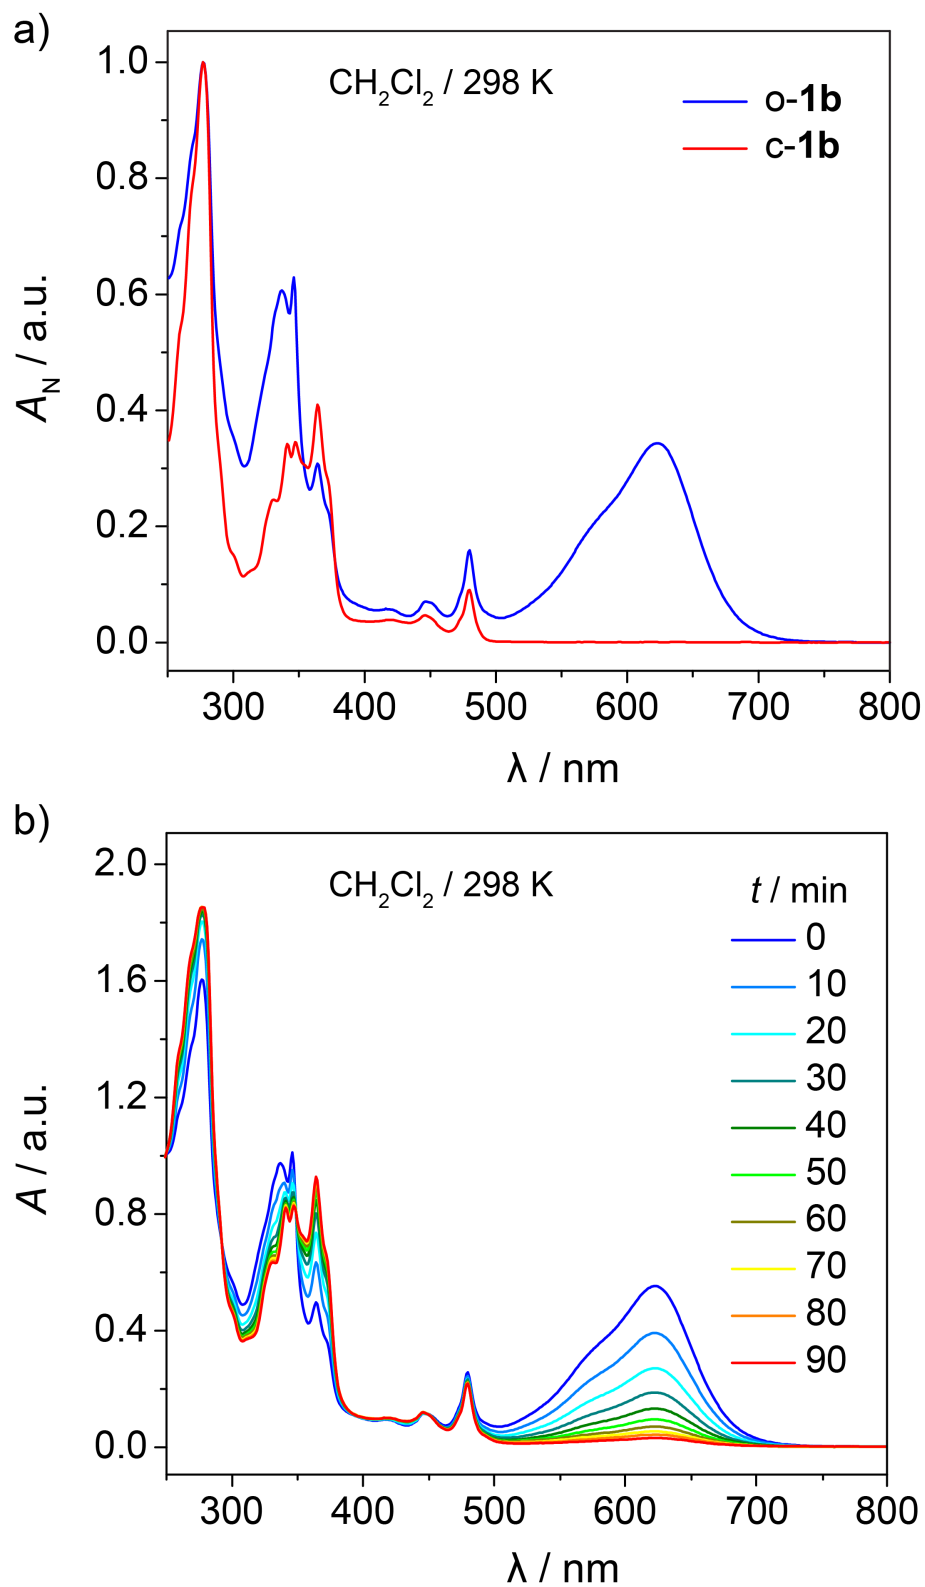

**Figure S1.** (a) The UV-vis spectra of the solution of c-1b in CH<sub>2</sub>Cl<sub>2</sub> (~10<sup>-4</sup> M) before (red) and after (blue) irradiation at 298 K and (b) the UV-vis spectra of the solution of c-1b in CH<sub>2</sub>Cl<sub>2</sub> (~10<sup>-4</sup> M) after irradiation recorded within the period of 90 min when it was left standing at 298 K in the dark.

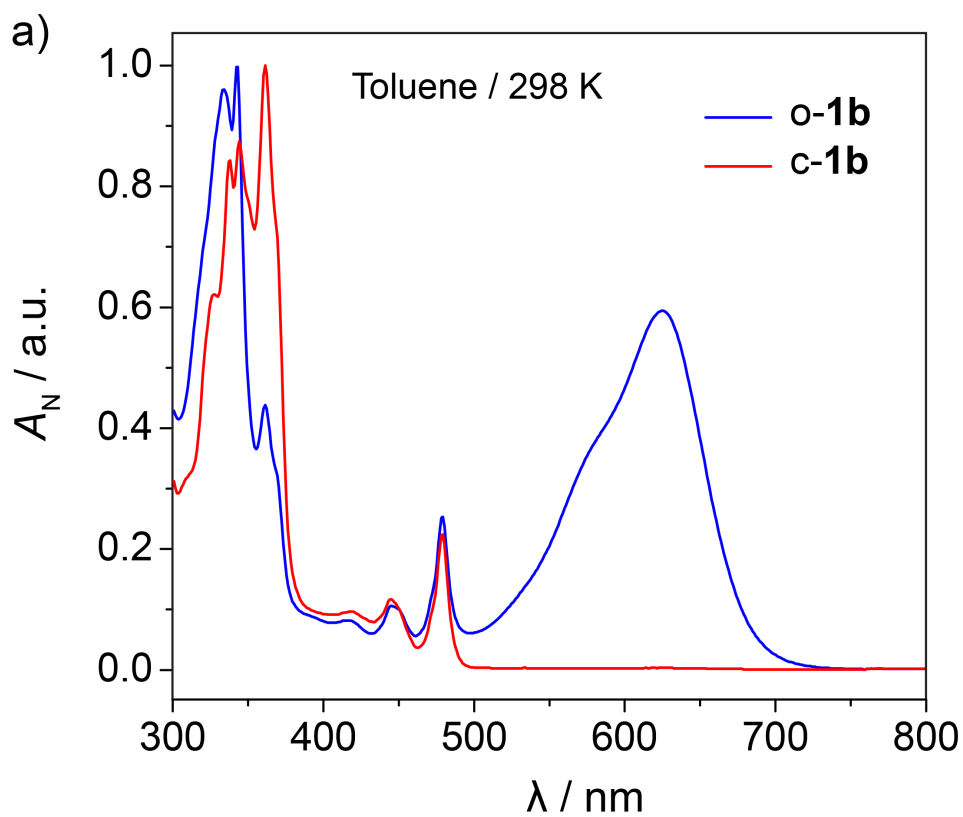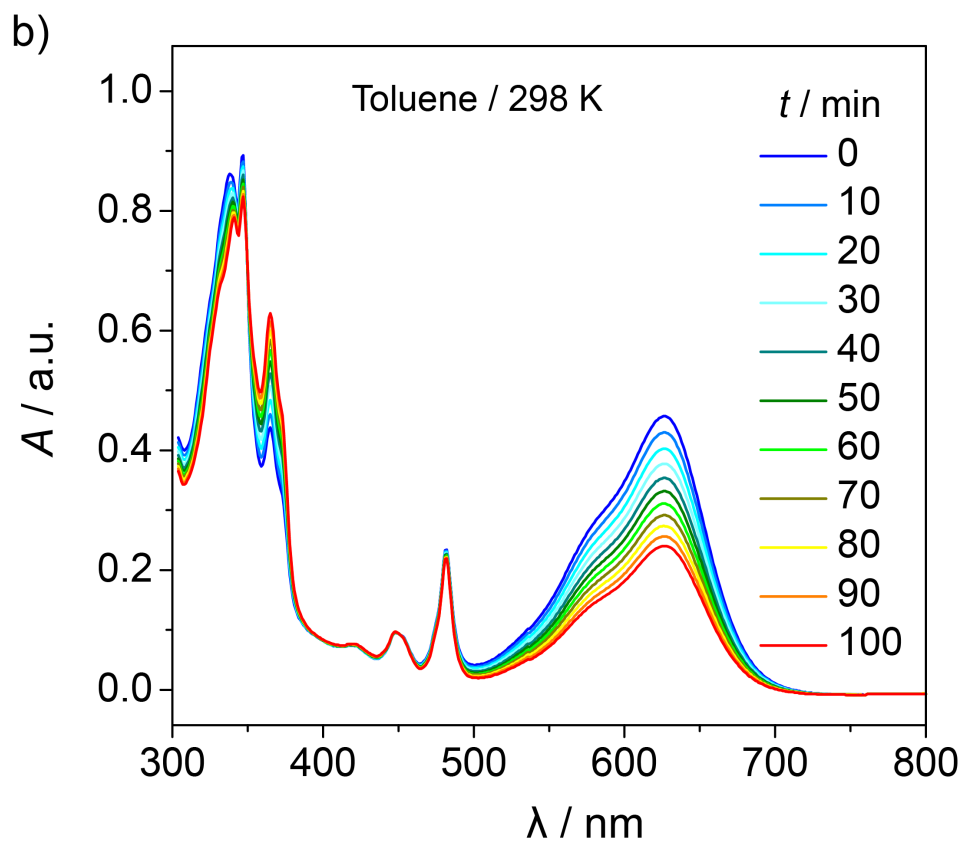

**Figure S2.** (a) The UV-vis spectra of the solution of c-1b in toluene ( $\sim 10^{-4}$  M) before (red) and after (blue) irradiation at 298 K and (b) the UV-vis spectra of the solution of c-1b in toluene ( $\sim 10^{-4}$  M) after irradiation recorded within the period of 100 min when it was left standing at 298 K in the dark.

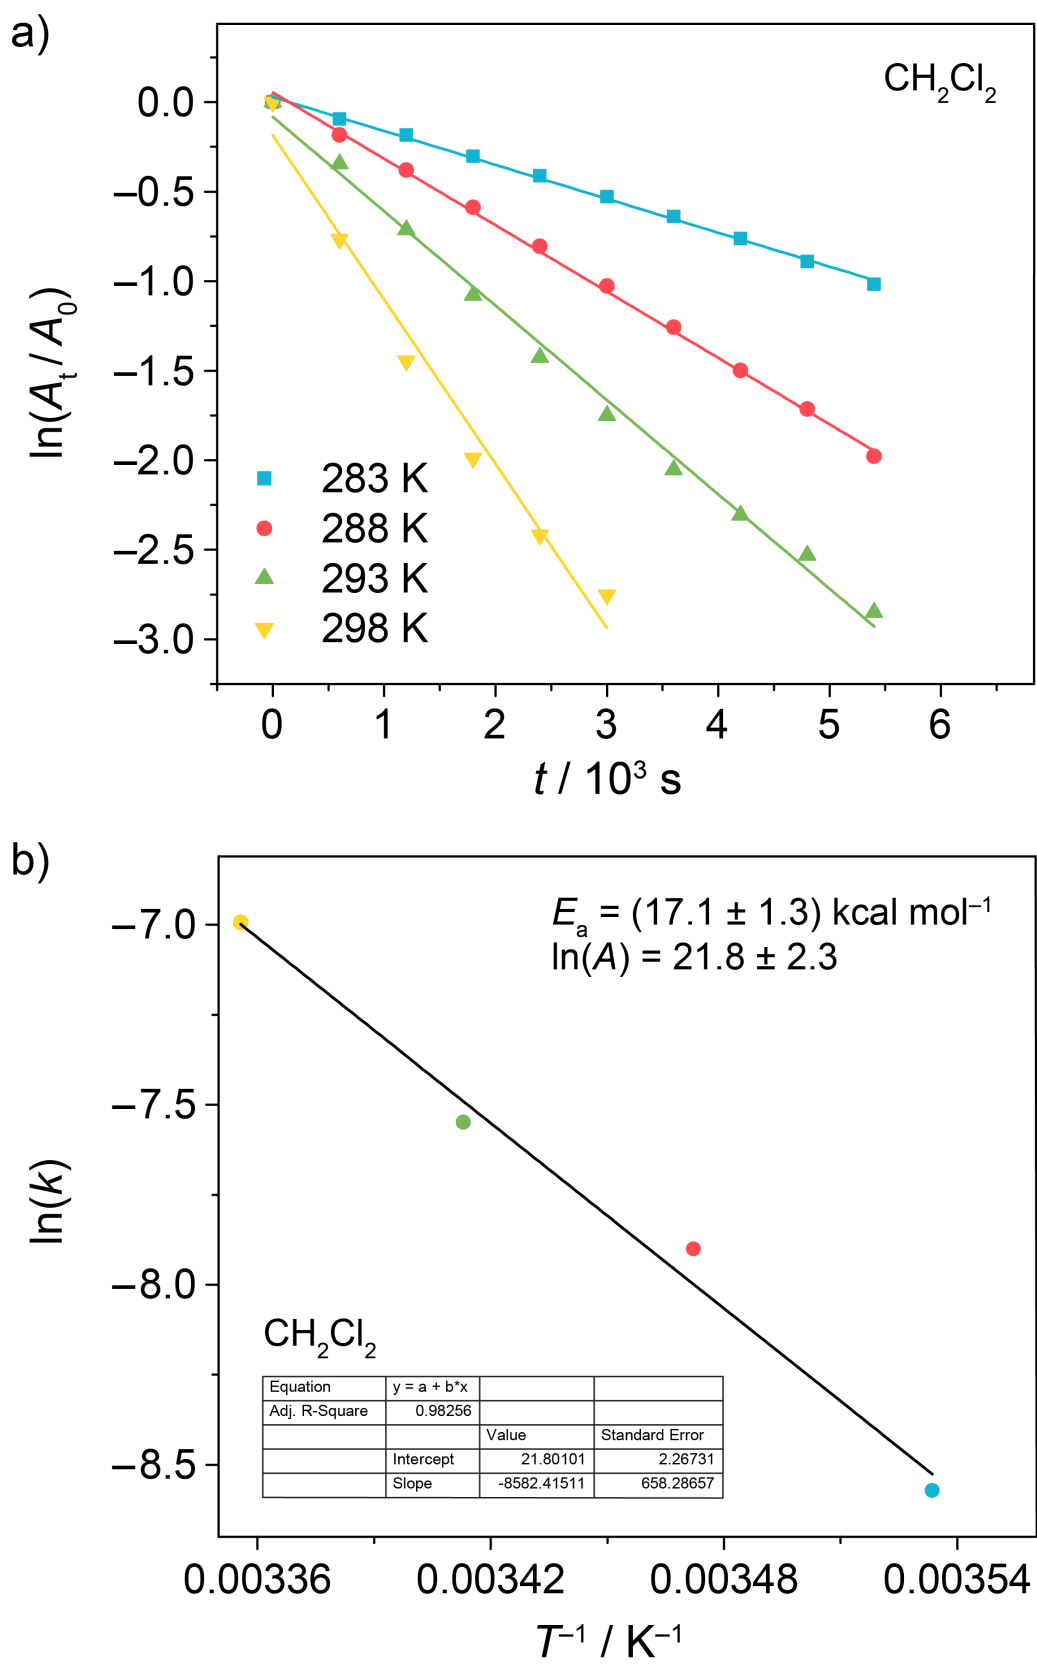

**Figure S3.** (a) The plots of  $\ln(A_t/A_0)$  against  $t$  at various temperatures used for determination of the  $k$  values and (b) the plot of  $\ln(k)$  against  $1/T$  used for determination of  $E_a$  and  $A$  in CH<sub>2</sub>Cl<sub>2</sub>.

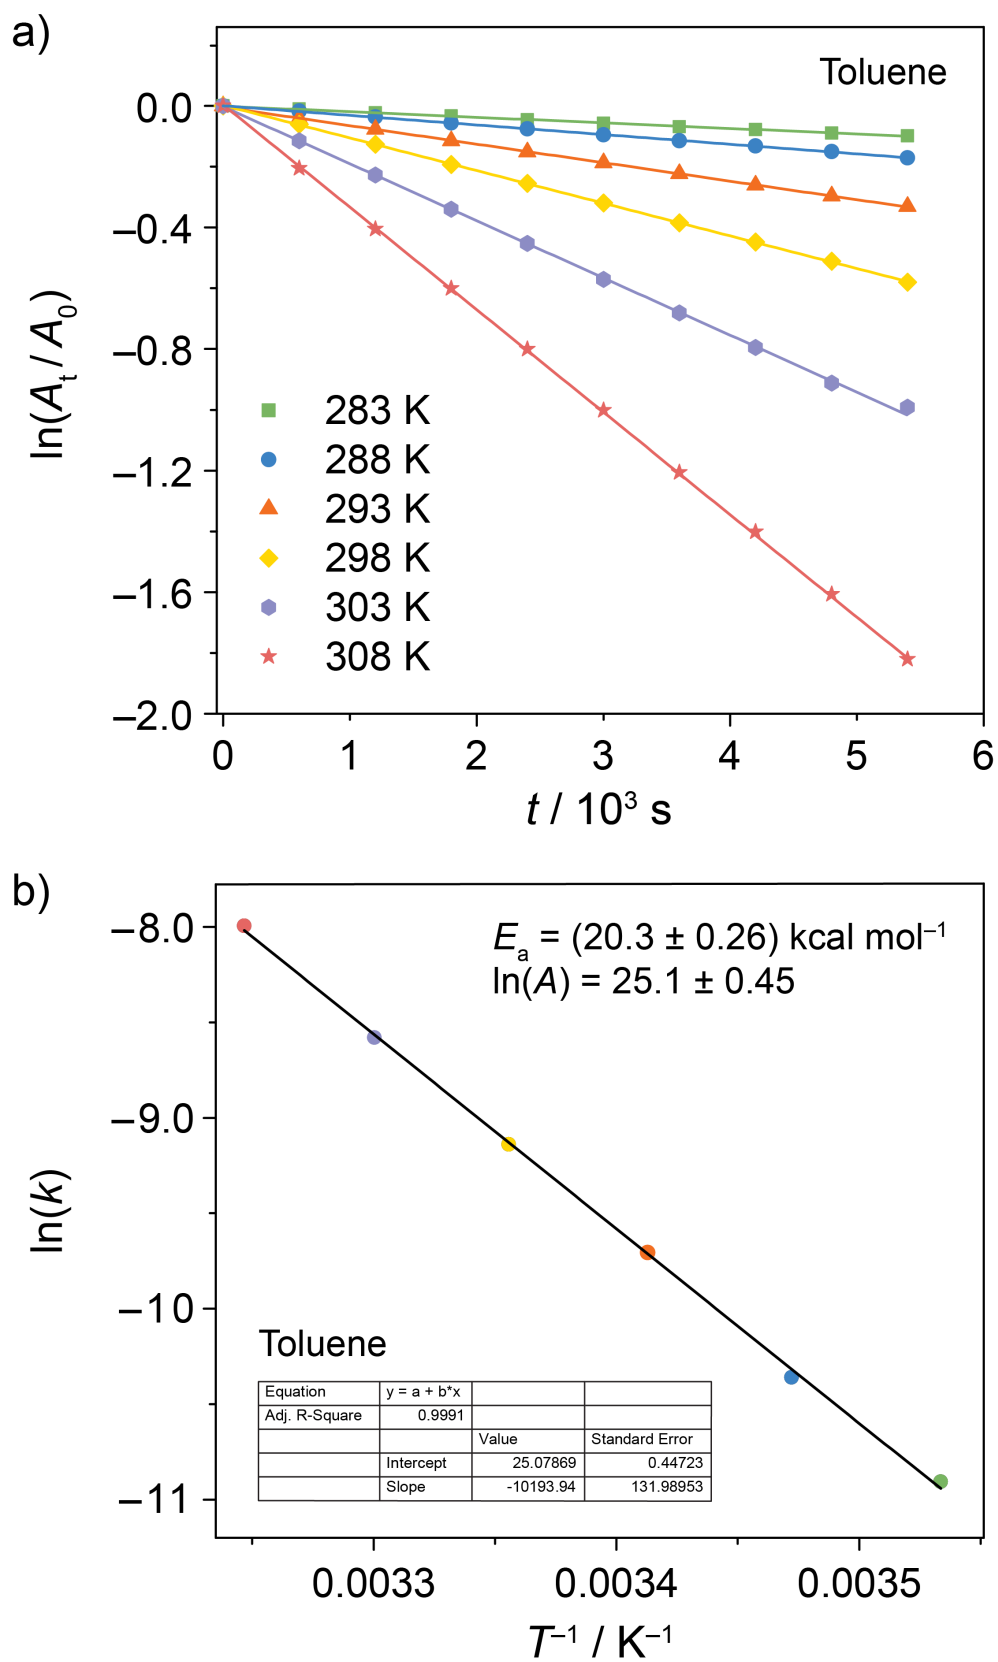

**Figure S4.** (a) The plots of  $\ln(A_t/A_0)$  against  $t$  at various temperatures used for determination of the  $k$  values and (b) the plot of  $\ln(k)$  against  $1/T$  used for determination of  $E_a$  and  $A$  in toluene.

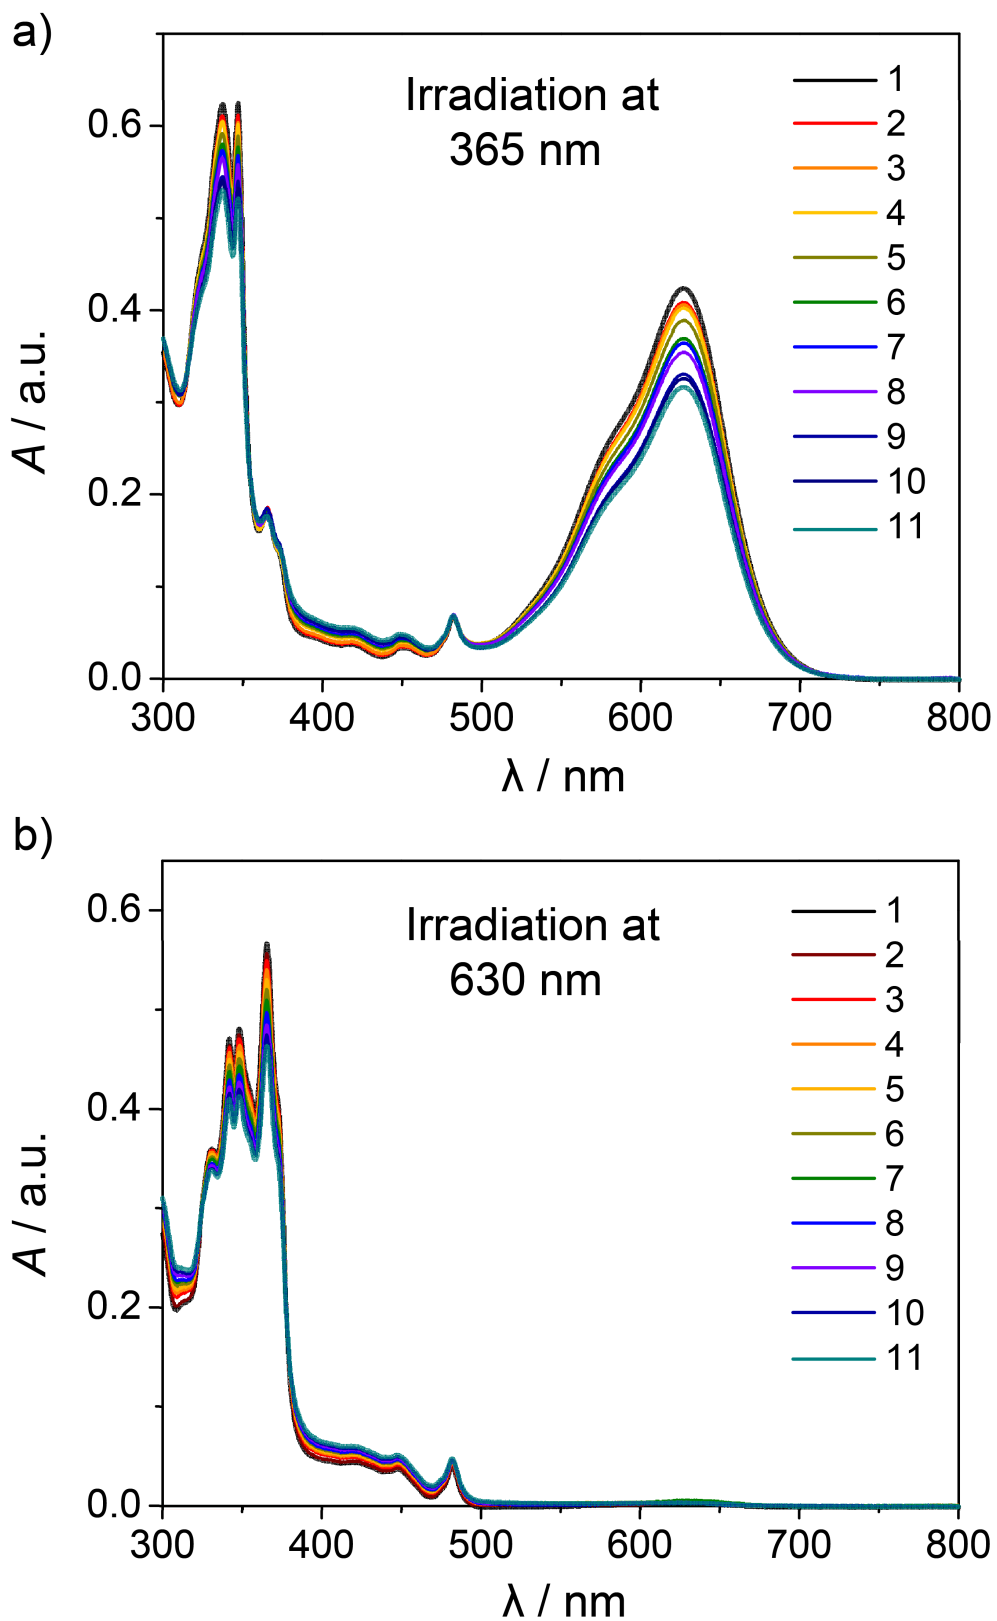

**Figure S5.** Evolution of the UV-vis absorption spectra during 11 irradiation cycles at room temperature under aerated conditions. One irradiation cycle involves (a) irradiation of a solution of **c-1b** in toluene ( $\sim 10^{-4}$  M) at 365 nm for 1 min and (b) subsequent irradiation at 630 nm for 1 min.

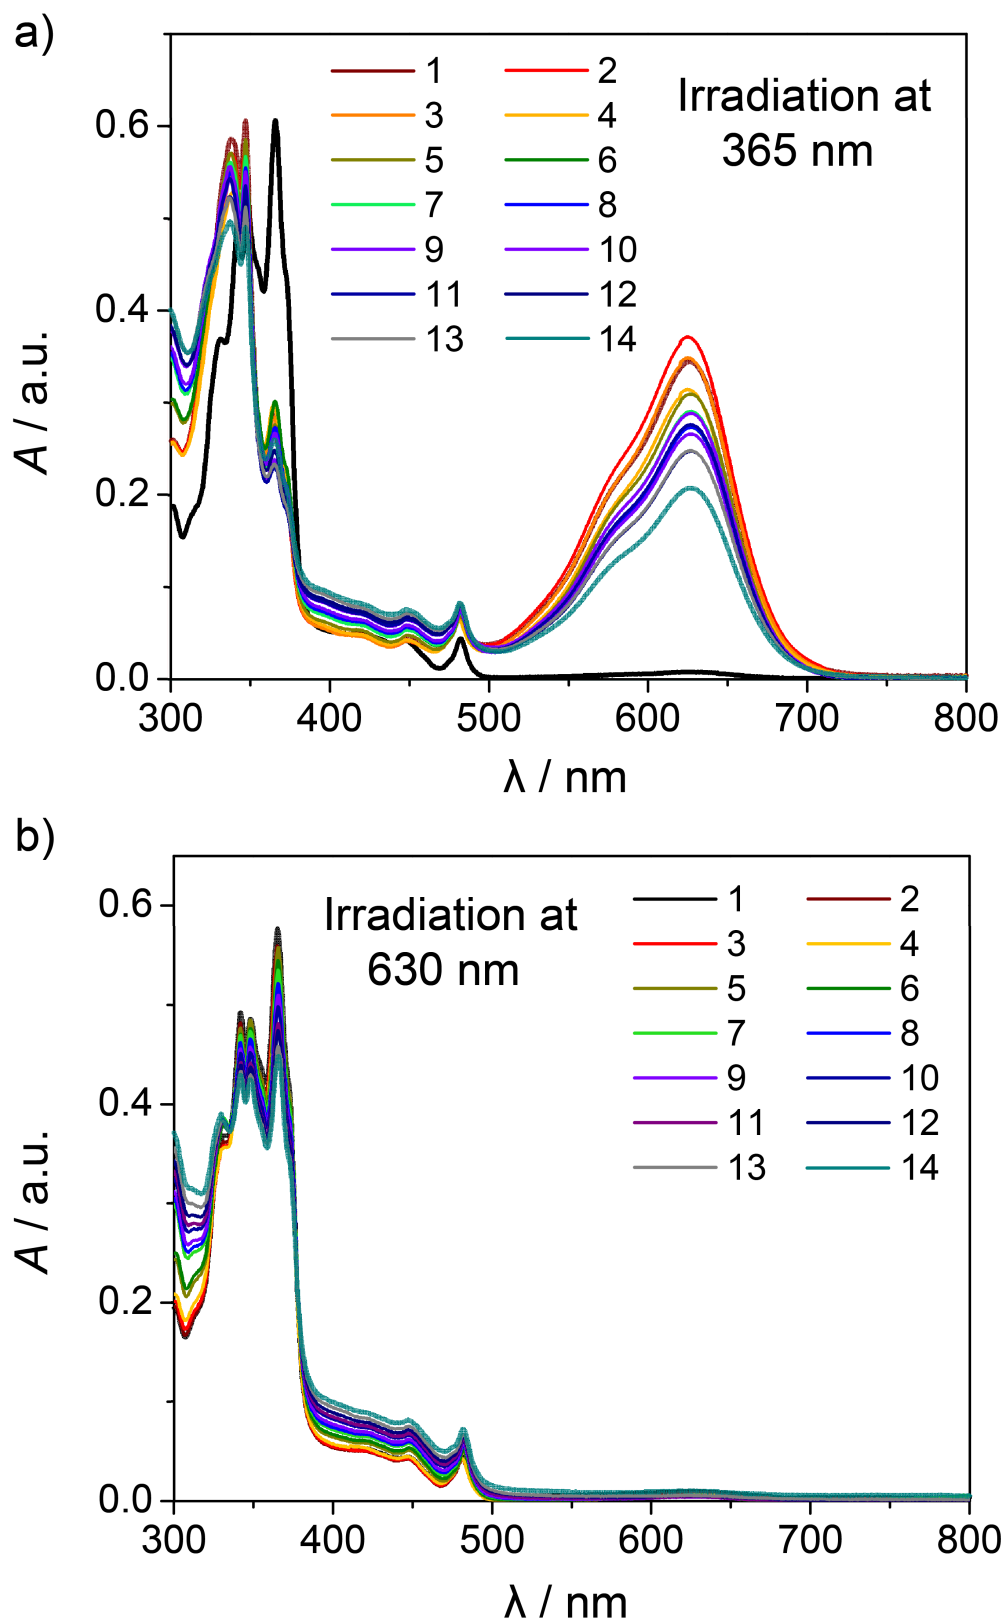

**Figure S6.** Evolution of the UV-vis absorption spectra during 14 irradiation cycles at room temperature under argon-saturated conditions. One irradiation cycle involves (a) irradiation of a solution of **c-1b** in toluene ( $\sim 10^{-4}$  M) at 365 nm for 1 min and (b) subsequent irradiation at 630 nm for 1 min.



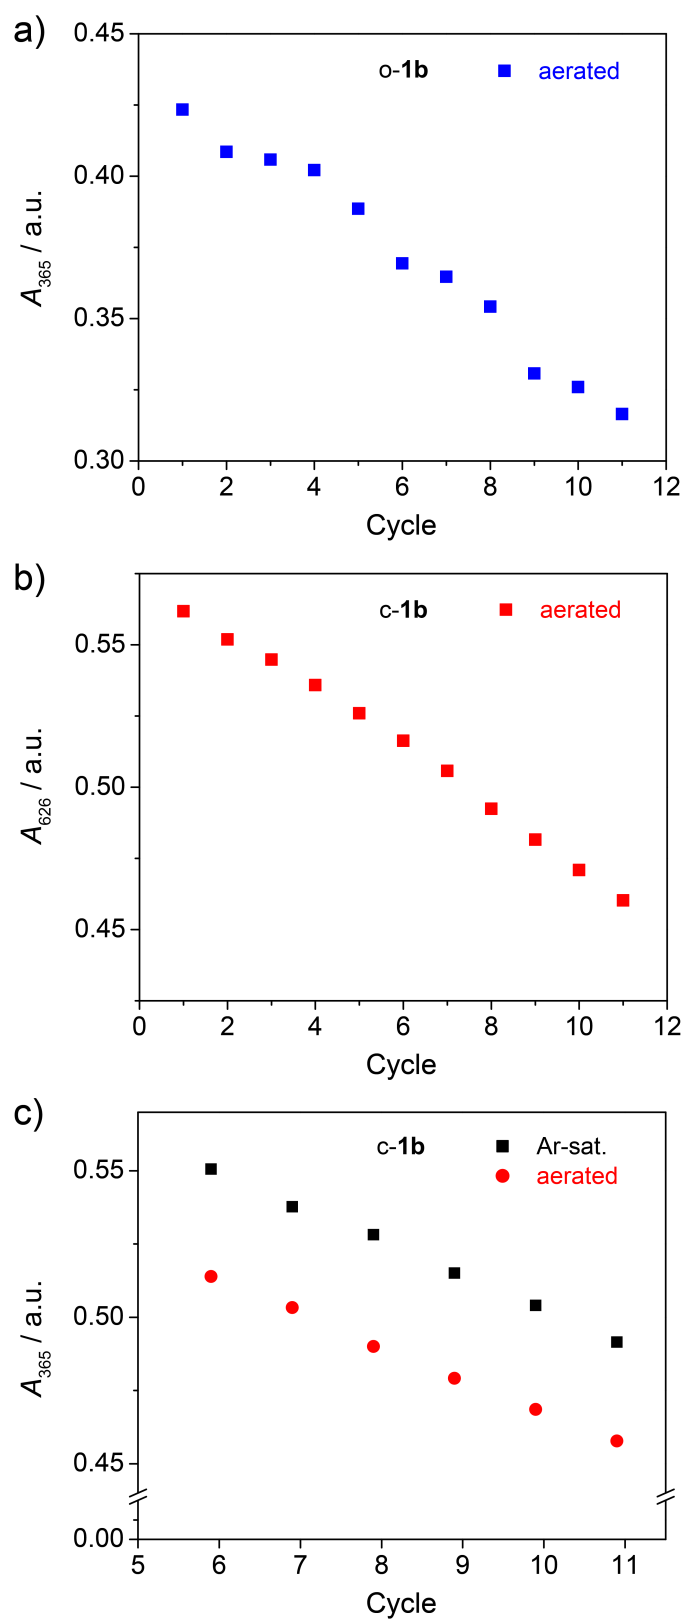

**Figure S7.** (a,b) Evolution of absorption at (a) 626 and (b) 365 nm during 11 irradiation cycles at room temperature under aerated conditions. One irradiation cycle involves (a) irradiation of a solution of **c-1b** in toluene ( $\sim 10^{-4}$  M) at 365 nm for 1 min and (b) subsequent irradiation at 630 nm for 1 min. (c) Comparison of the evolution of absorption at 365 nm for argon-saturated and aerated conditions.

### S3. HPLC Separation of Enantiomers of c-1b

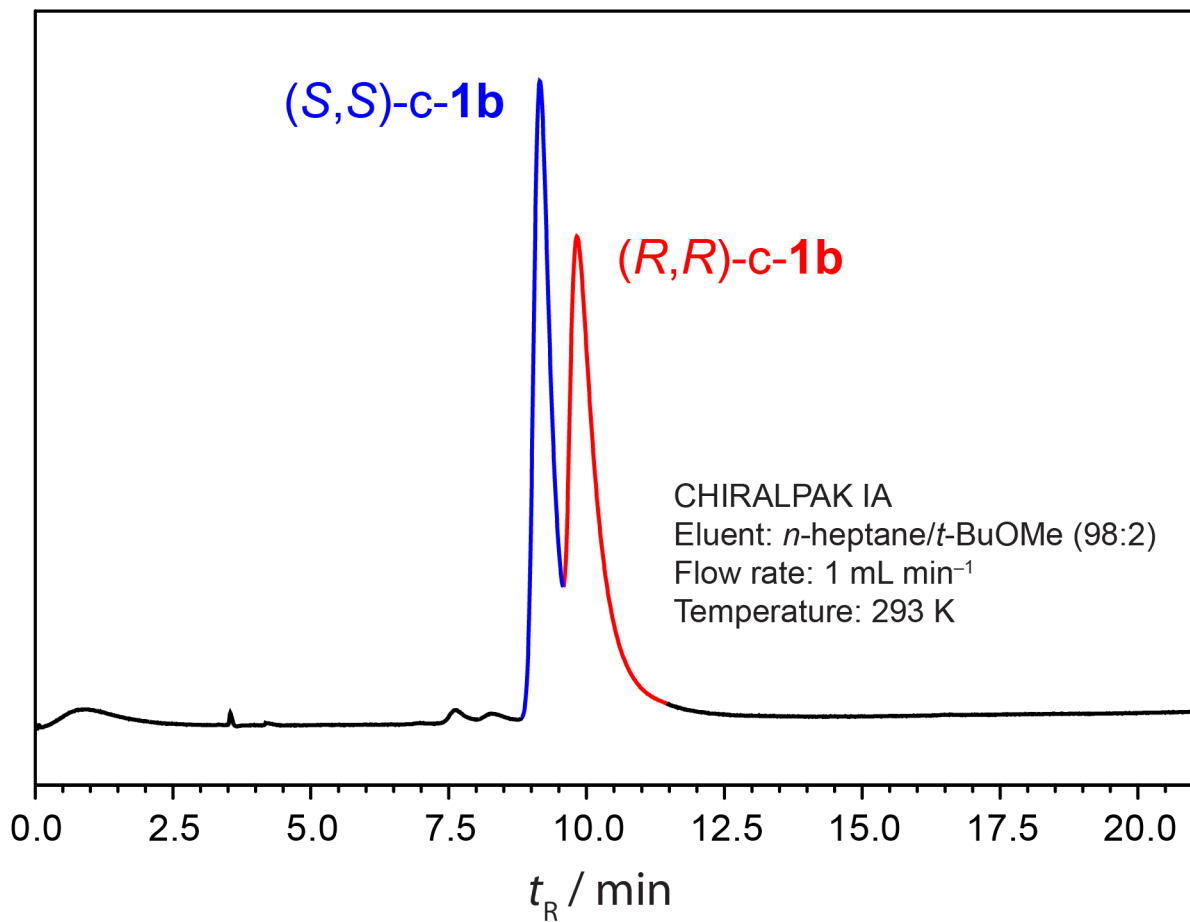

**Figure S8.** HPLC chromatogram for the separation of enantiomers of c-1b. The absolute configurations of the enantiomers were assigned with the help of TD-DFT calculations (see Figure S9).

#### S4. Circular Dichroism (CD) Spectroscopy

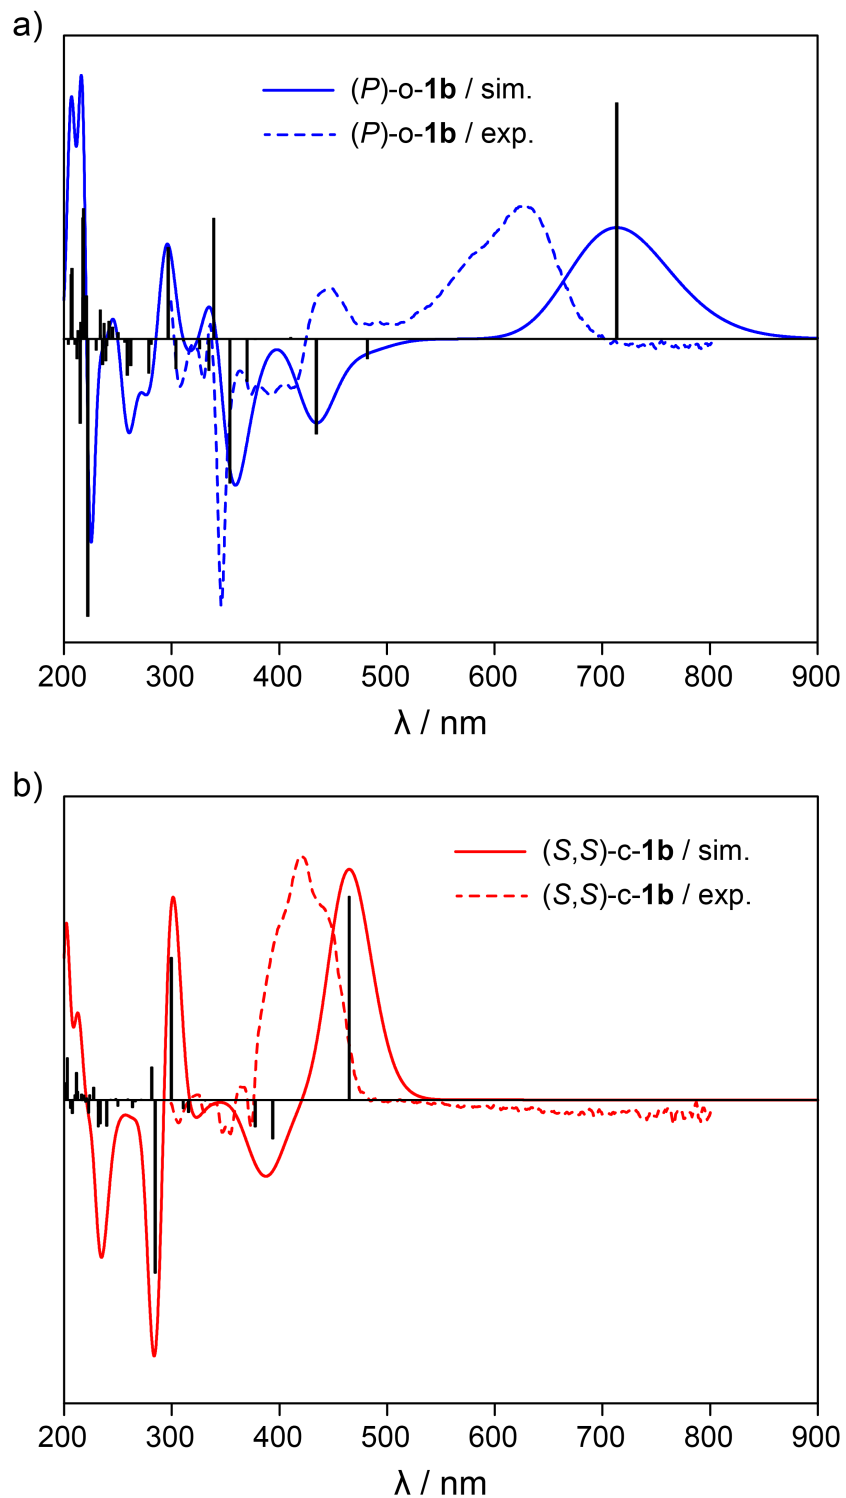

**Figure S9.** Comparison of the CD spectra of toluene solutions of  $(P)$ -**o-1b** (a; dashed blue line) and  $(S,S)$ -**c-1b** (b; dashed red line) with those simulated by TD-DFT calculations (blue and red solid lines, respectively, and black vertical lines; B3LYP/6-31G(d)/cc-pVDZ/PCM(toluene)). The CD spectrum of  $(P)$ -**o-1b** (dashed blue line) reveals that the sample contained a small quantity of  $(S,S)$ -**c-1b** that formed via the thermal process during sample preparation and/or measurement.

## S5. X-Ray Crystallography

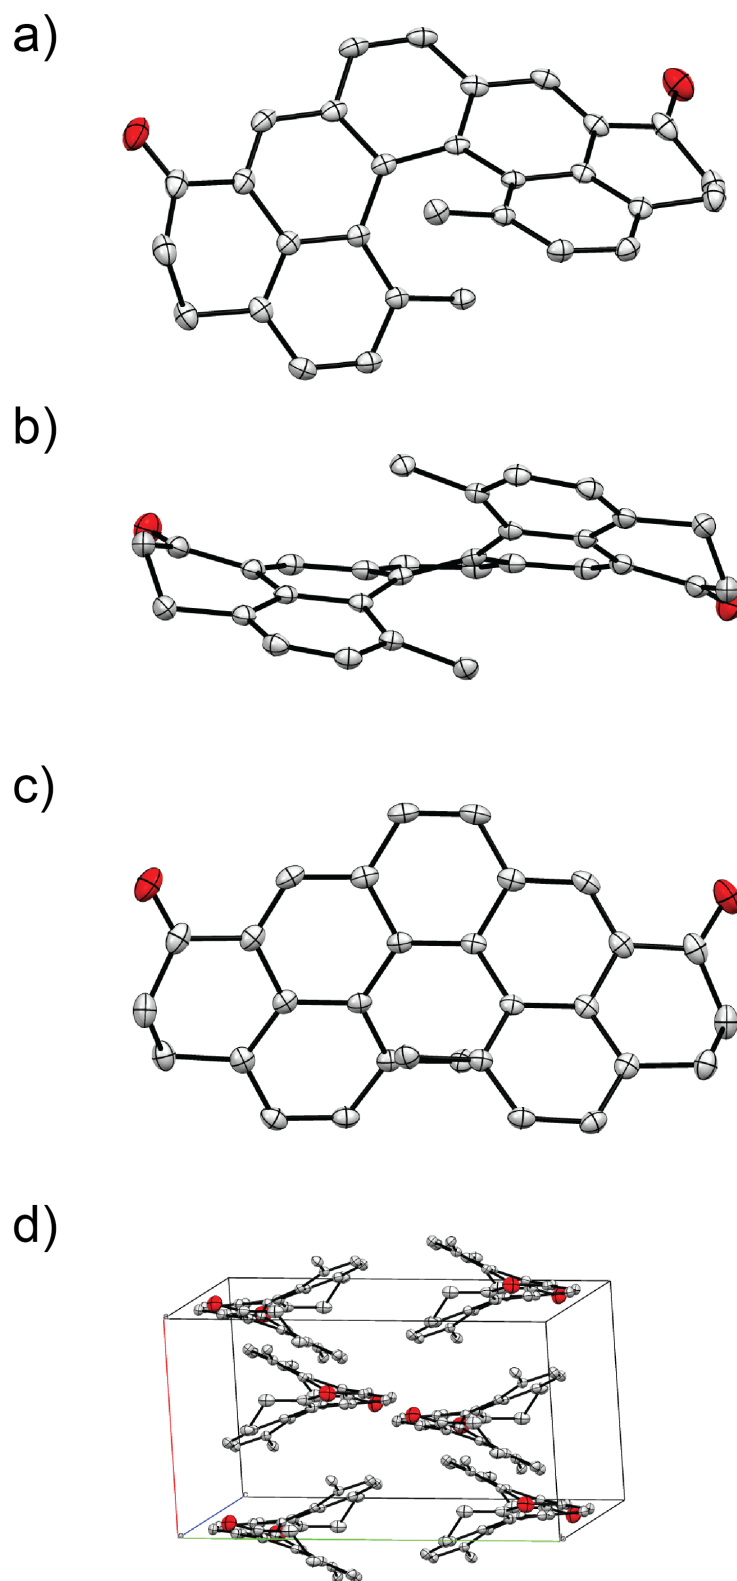

**Figure S10.** Crystallographic views of the solid-state structure of **7**: (a) perspective, (b) side, (c) top, (d) packing. Thermal ellipsoids are shown at the 50% probability level. Color code: C / gray, O / red.

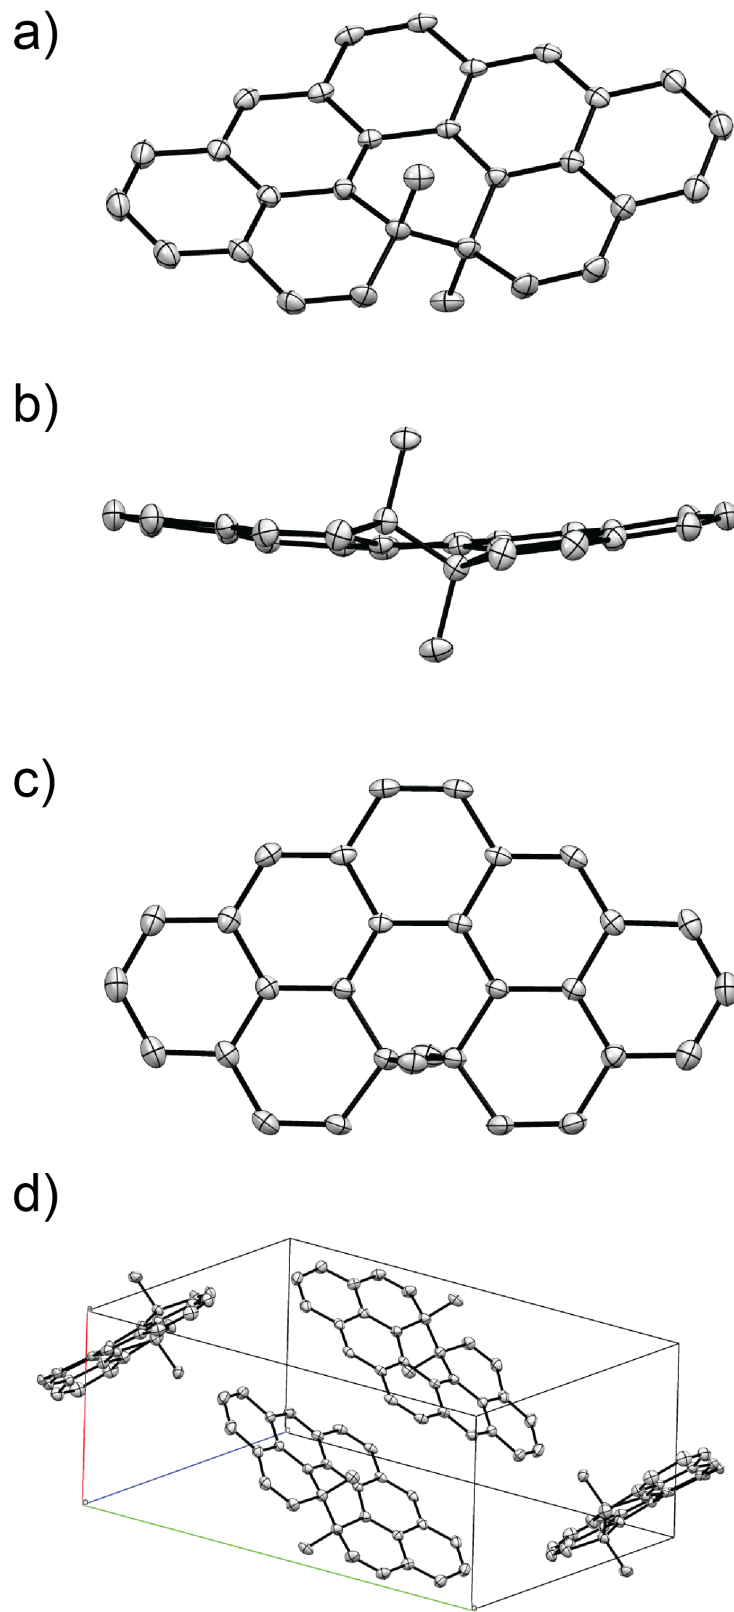

**Figure S11.** Crystallographic views of the solid-state structure of **c-1b**: (a) perspective, (b) side, (c) top, (d) packing. Thermal ellipsoids are shown at the 50% probability level. Color code: C / gray.

**Table S1.** Crystal parameters and structure refinements for compounds **7** and **c-1b**.

|                                                                                  | <b>7</b>                                                          | <b>c-1b</b>                                                       |
|----------------------------------------------------------------------------------|-------------------------------------------------------------------|-------------------------------------------------------------------|
| CCDC                                                                             | 1563973                                                           | 1563974                                                           |
| Formula                                                                          | C <sub>30</sub> H <sub>22</sub> O <sub>2</sub>                    | C <sub>30</sub> H <sub>20</sub>                                   |
| Formula weight                                                                   | 414.50                                                            | 380.46                                                            |
| Crystal system                                                                   | Monoclinic                                                        | Monoclinic                                                        |
| Space group                                                                      | <i>C2/c</i> (No. 15)                                              | <i>P2<sub>1</sub>/c</i> (No. 14)                                  |
| <i>a</i> / Å                                                                     | 9.2601(11)                                                        | 7.82299(16)                                                       |
| <i>b</i> / Å                                                                     | 14.9860(11)                                                       | 17.3405(4)                                                        |
| <i>c</i> / Å                                                                     | 14.9657(14)                                                       | 13.9697(3)                                                        |
| $\alpha$ / °                                                                     | 90                                                                | 90                                                                |
| $\beta$ / °                                                                      | 107.491(4)                                                        | 96.824(2)                                                         |
| $\gamma$ / °                                                                     | 90                                                                | 90                                                                |
| <i>V</i> / Å <sup>3</sup>                                                        | 1980.8(3)                                                         | 1881.62(7)                                                        |
| <i>Z</i>                                                                         | 4                                                                 | 4                                                                 |
| $\rho$ (calc) / g cm <sup>-3</sup>                                               | 1.390                                                             | 1.343                                                             |
| $\mu$ / mm <sup>-1</sup>                                                         | 0.670 (CuK $\alpha$ )                                             | 0.076 (MoK $\alpha$ )                                             |
| <i>F</i> (000)                                                                   | 872                                                               | 800                                                               |
| Crystal size / mm                                                                | 0.04 × 0.08 × 0.08                                                | 0.09 × 0.14 × 0.21                                                |
| Temperature / K                                                                  | 123                                                               | 160(1)                                                            |
| Radiation / Å                                                                    | 1.54178 (CuK $\alpha$ )                                           | 0.71073 (MoK $\alpha$ )                                           |
| $\Theta_{\min}$ / °, $\Theta_{\max}$ / °                                         | 5.8, 70.3                                                         | 2.6, 32.4                                                         |
| Index ranges                                                                     | -11 ≤ <i>h</i> ≤ 11<br>-18 ≤ <i>k</i> ≤ 17<br>-15 ≤ <i>l</i> ≤ 18 | -11 ≤ <i>h</i> ≤ 11<br>-24 ≤ <i>k</i> ≤ 24<br>-19 ≤ <i>l</i> ≤ 19 |
| Reflections collected,<br>independent reflections, <i>R</i> (int)                | 12679, 1855, 0.033                                                | 29802, 5727, 0.0258                                               |
| Data, restraints, parameters                                                     | 1837, 0, 145                                                      | 5727, 0, 273                                                      |
| Goodness of fit                                                                  | 0.9553                                                            | 1.037                                                             |
| Final <i>R</i> , <i>wR</i> <sub>2</sub> [ <i>I</i> > -2.0 $\sigma$ ( <i>I</i> )] | 0.0354, 0.0826                                                    | 0.0524, 0.1461                                                    |
| Final <i>R</i> , <i>wR</i> <sub>2</sub> [all data]                               | 0.0357, 0.0830                                                    | 0.0621, 0.1530                                                    |
| Min. diff. density / e Å <sup>-3</sup>                                           | -0.17                                                             | -0.23                                                             |
| Max. diff. density / e Å <sup>-3</sup>                                           | 0.22                                                              | 0.66                                                              |

## S6. DFT Calculations

**Table S2.** Calculated<sup>a</sup> ST energy gaps ( $\Delta E_{ST} = E_T - E_S$ ) and the energy differences ( $\Delta E_{BS/RS} = E_{RS} - E_{BS}$ ) of the spin-unrestricted broken-symmetry (BS) and restricted (RS) singlet DFT wave functions of **o-1b** and **c-1b**.

| Compound    | $\Delta E / \text{kcal mol}^{-1}$ | B3LYP            | CAM-B3LYP                 | BMK              | M06-2X           |
|-------------|-----------------------------------|------------------|---------------------------|------------------|------------------|
| <b>o-1b</b> | $\Delta E_{ST}^{b,c}$             | 10.1             | 7.3 (9.4 <sup>c,d</sup> ) | 10.8             | 12.4             |
|             | $\Delta E_{BS/RS}$                | N/A <sup>e</sup> | 2.2                       | N/A <sup>e</sup> | N/A <sup>e</sup> |
| <b>c-1b</b> | $\Delta E_{ST}^{b,c}$             | 39.8             | –                         | –                | –                |

<sup>a</sup> Calculated with cc-pVTZ basis set on 6-31G(d) geometries. <sup>b</sup> Restricted DFT was used to model the singlet states. <sup>c</sup> ZPVE corrections are included. <sup>d</sup> Spin-unrestricted broken-symmetry singlet wave function was used. <sup>e</sup> Not available for this method.

**Table S3.** Calculated reaction barriers of electrocyclization of **o-1b** to **c-1b**.<sup>a</sup>

| $\Delta E / \text{kcal mol}^{-1}$                   | B3LYP                                             | BMK  | CAM-B3LYP                 | M06-2X | M06L |
|-----------------------------------------------------|---------------------------------------------------|------|---------------------------|--------|------|
| <b>o-1b</b> → <b>c-1b</b>                           | 24.1 (24.4 <sup>c,d</sup> , 24.6 <sup>c,e</sup> ) | 22.4 | 20.6 (22.8 <sup>b</sup> ) | 24.6   | 24.2 |
| <sup>3</sup> <b>o-1b</b> → <sup>3</sup> <b>c-1b</b> | 26.7                                              | 24.5 | 30.8                      | 25.9   | 25.2 |

<sup>a</sup> Reaction barriers (in kcal mol<sup>-1</sup> at 0 K) calculated (cc-pVTZ basis set) with the respective functional on 6-31G(d) geometries with ZPVEs; the transition states are treated with spin-unrestricted (triplets) and spin-unrestricted broken-symmetry (BS; singlets) formalism. The reaction paths to **c-1b** possess C<sub>2</sub> symmetry. <sup>b</sup> Spin-unrestricted broken-symmetry singlet wave function was used for **o-1b**. <sup>c</sup> With solvation modelled at the B3LYP/cc-pVTZ level of theory subtracting the gas-phase electronic energy from the electronic energy obtained with the SMD model. <sup>d</sup> Toluene. <sup>e</sup> CH<sub>2</sub>Cl<sub>2</sub>.

**Table S4.** The first electronic transitions and the HOMO–LUMO gaps from TD-DFT and DFT calculations, respectively, for parent planar heptazethrene, **o-1**, and **o-1b**.

| Compound      | $\lambda_{\text{calc}}^a / \text{nm}$ | $\lambda_{\text{calc}}^a / \text{eV}$ | $\Delta E_{\text{HOMO-LUMO}}^b / \text{eV}$ |
|---------------|---------------------------------------|---------------------------------------|---------------------------------------------|
| Heptazethrene | 587 (1.3123)                          | 2.11                                  | 1.78                                        |
| <b>o-1</b>    | 708 (0.6640)                          | 1.75                                  | 1.69                                        |
| <b>o-1b</b>   | 613 (0.6242)                          | 2.02                                  | 1.86                                        |

<sup>a</sup> Calculated at TD-R-M06-2X/cc-pVDZ/PCM(toluene) level of theory on R-M06-2X/6-311+G(d) gas-phase geometries. The number in the parenthesis is the calculated oscillatory strength. <sup>b</sup> Calculated at R-B3LYP/6-311+G(d) level of theory in the gas phase.





(±)-(12a*R*,12b*R*)-12a,12b-Dimethyl-12a,12b-dihydrophenanthro[2,1,10,9,8,7-*pqrstuv*]pentaphene  
(c-1b)

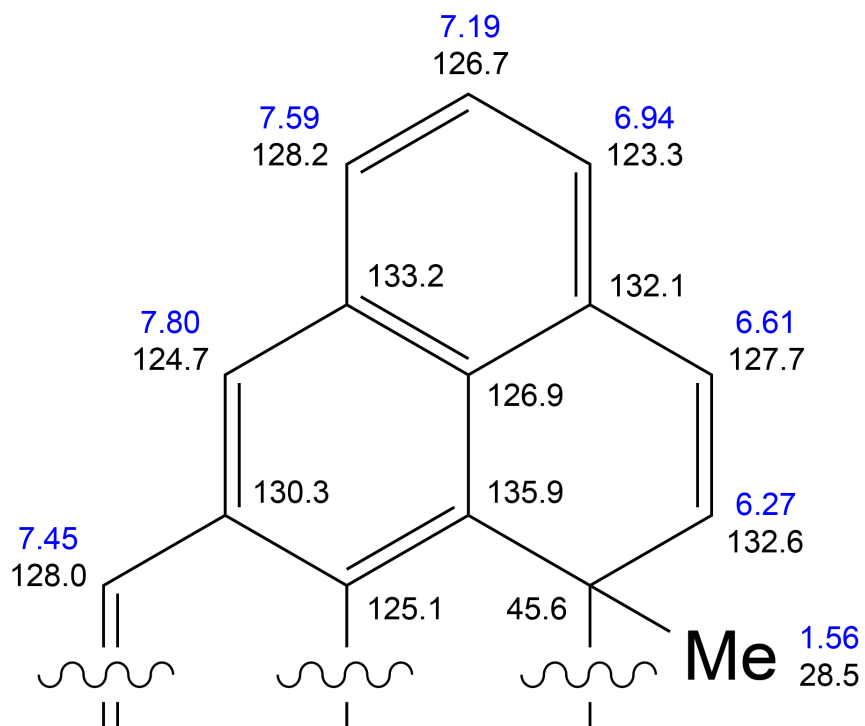

13,14-Dimethyldibenzo[*pq,uv*]pentaphene (o-1b)

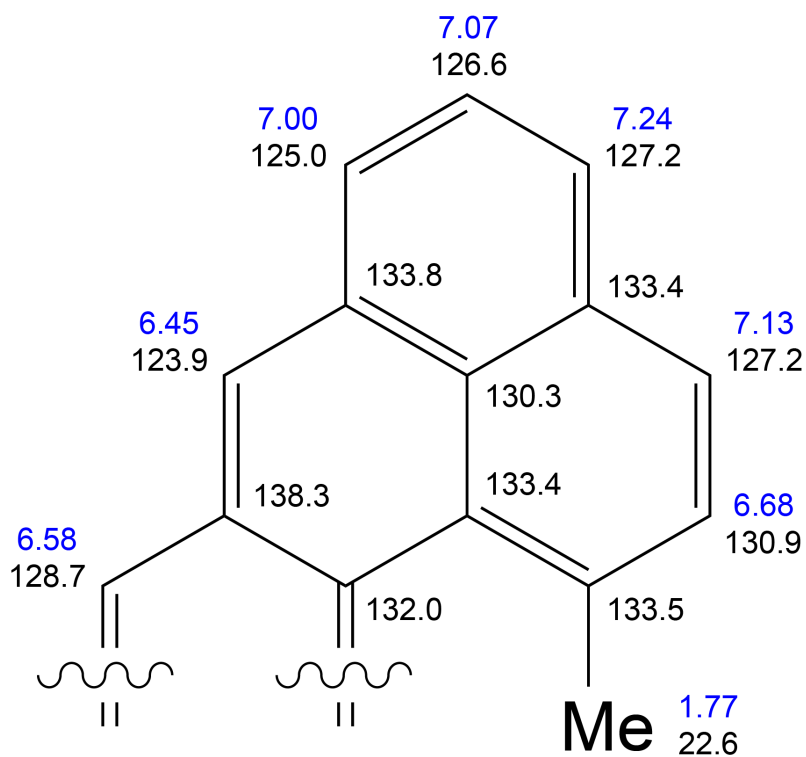

## S8. Copies of NMR Spectra

### (±)-Dimethyl 3,3'-(10,11-dimethyldibenzo[*c,g*]phenanthrene-7,14-diyl)(2*E*,2'*E*)-diacrylate (**9**)

$^1\text{H}$  NMR / 400 MHz /  $\text{CD}_2\text{Cl}_2$

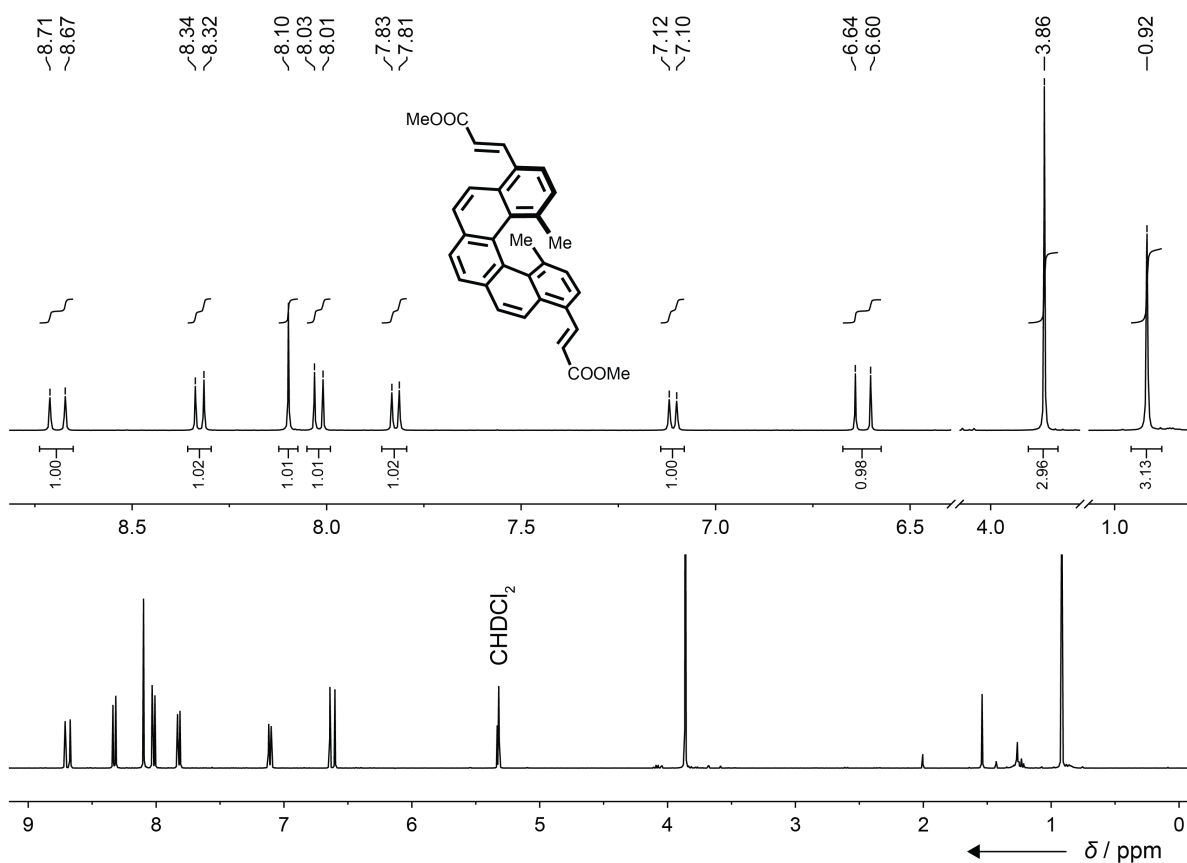

$^{13}\text{C}$  NMR / 101 MHz /  $\text{CD}_2\text{Cl}_2$

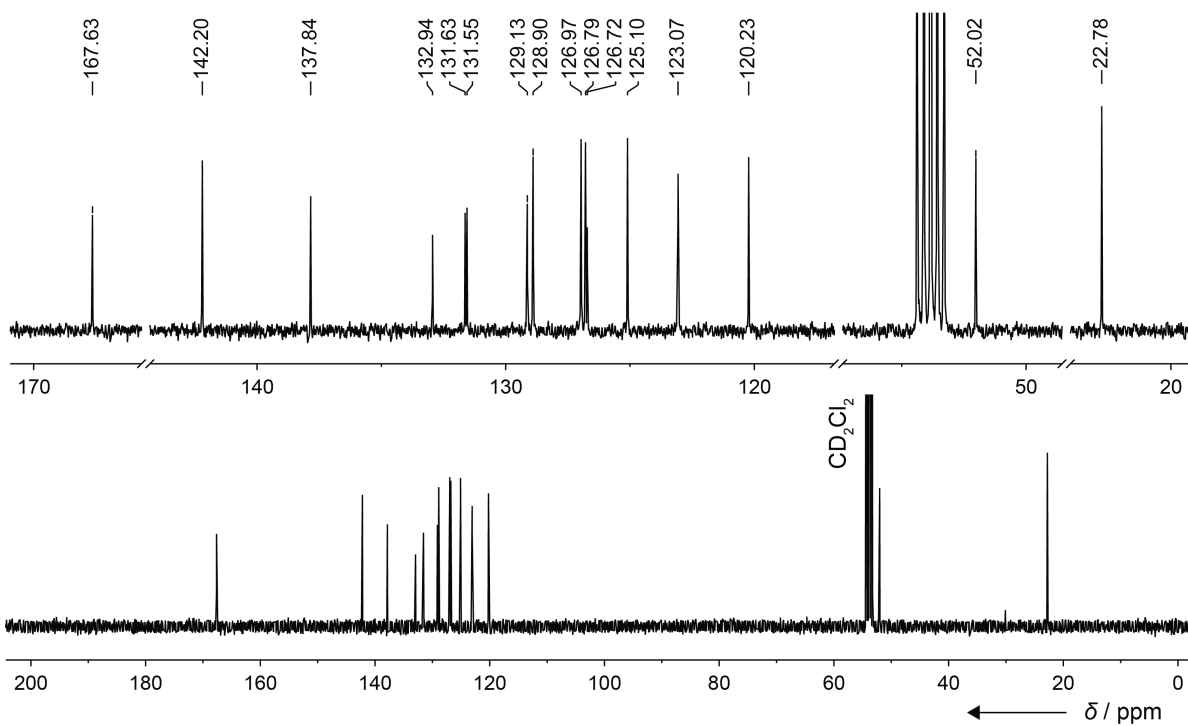

(±)-Dimethyl 3,3'-(10,11-dimethyldibenzo[*c,g*]phenanthrene-7,14-diyl)dipropionate (6)

$^1\text{H NMR}$  / 400 MHz /  $\text{CD}_2\text{Cl}_2$

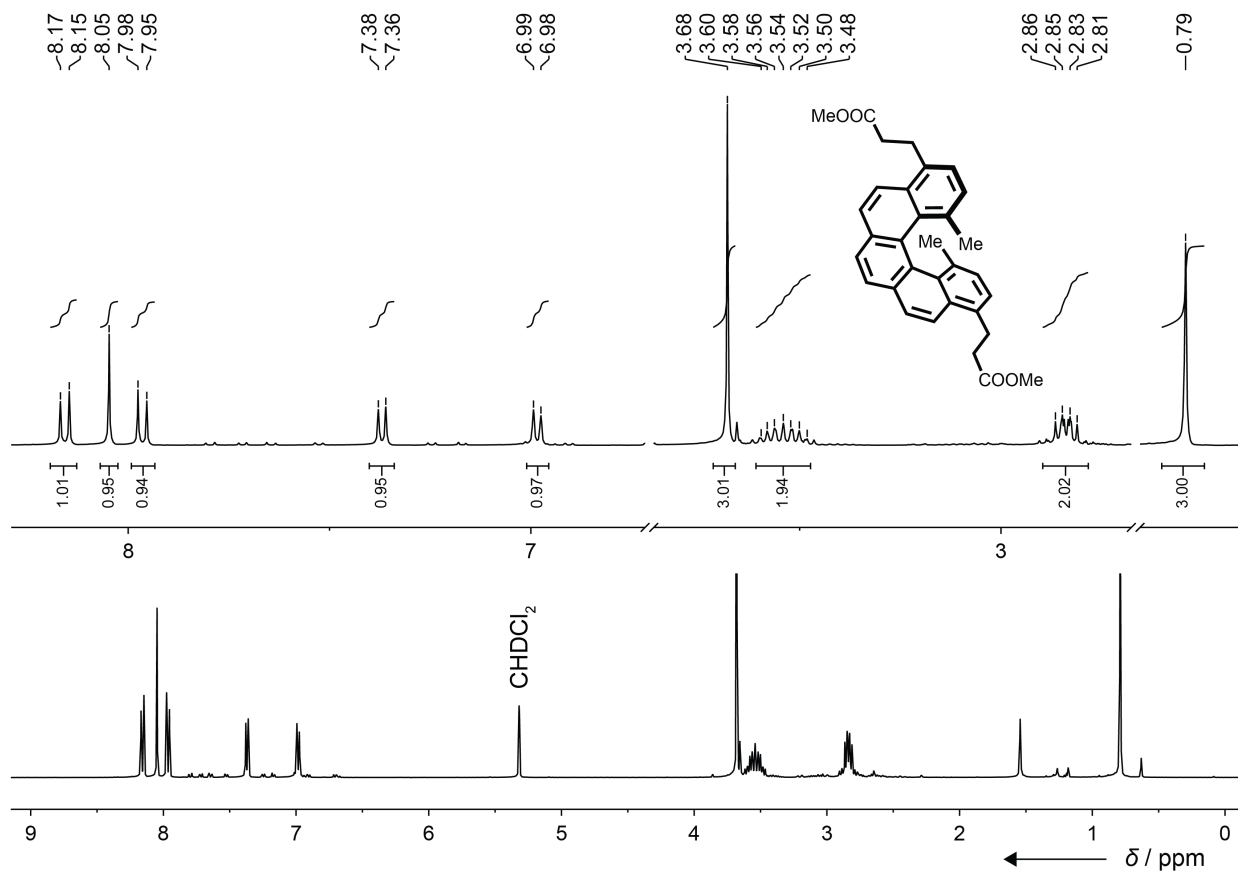

$^{13}\text{C NMR}$  / 101 MHz /  $\text{CD}_2\text{Cl}_2$

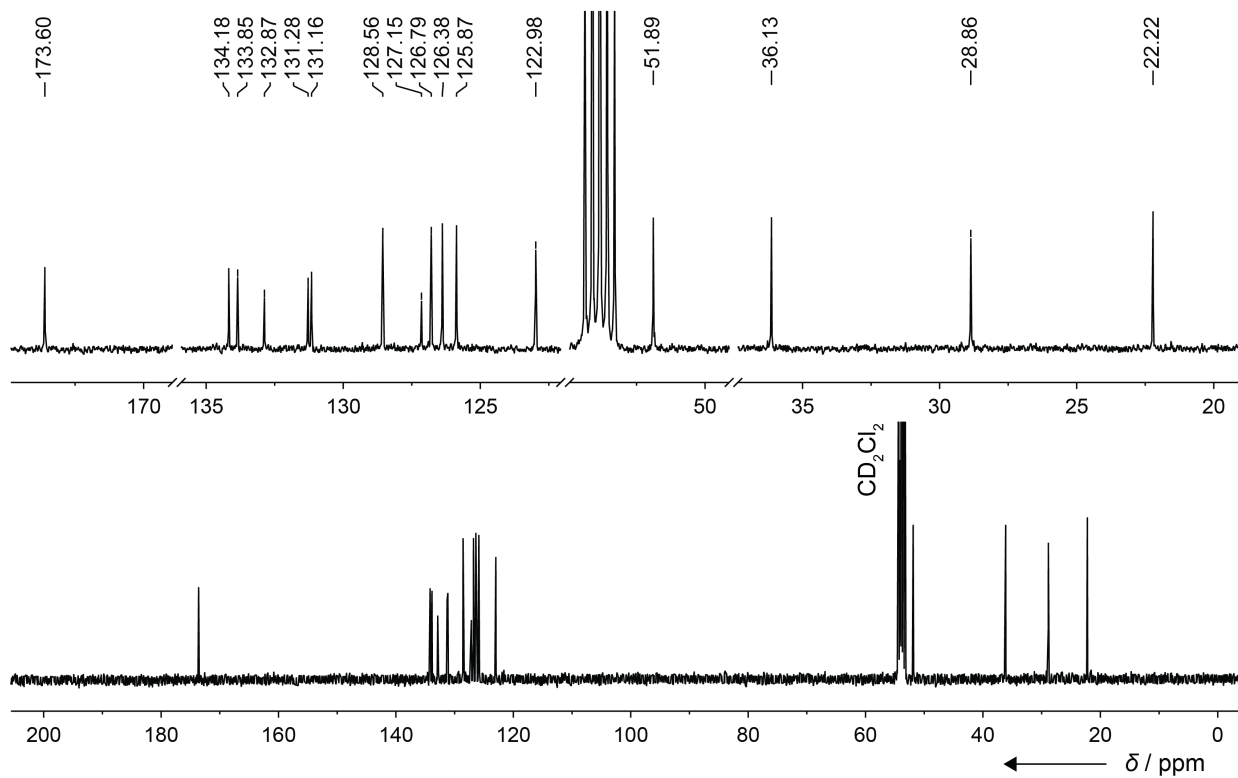

(±)-3,3'-(10,11-Dimethyldibenzo[*c,g*]phenanthrene-7,14-diyl)dipropionic acid (10)

$^1\text{H NMR}$  / 400 MHz /  $\text{CD}_3\text{COCD}_3$

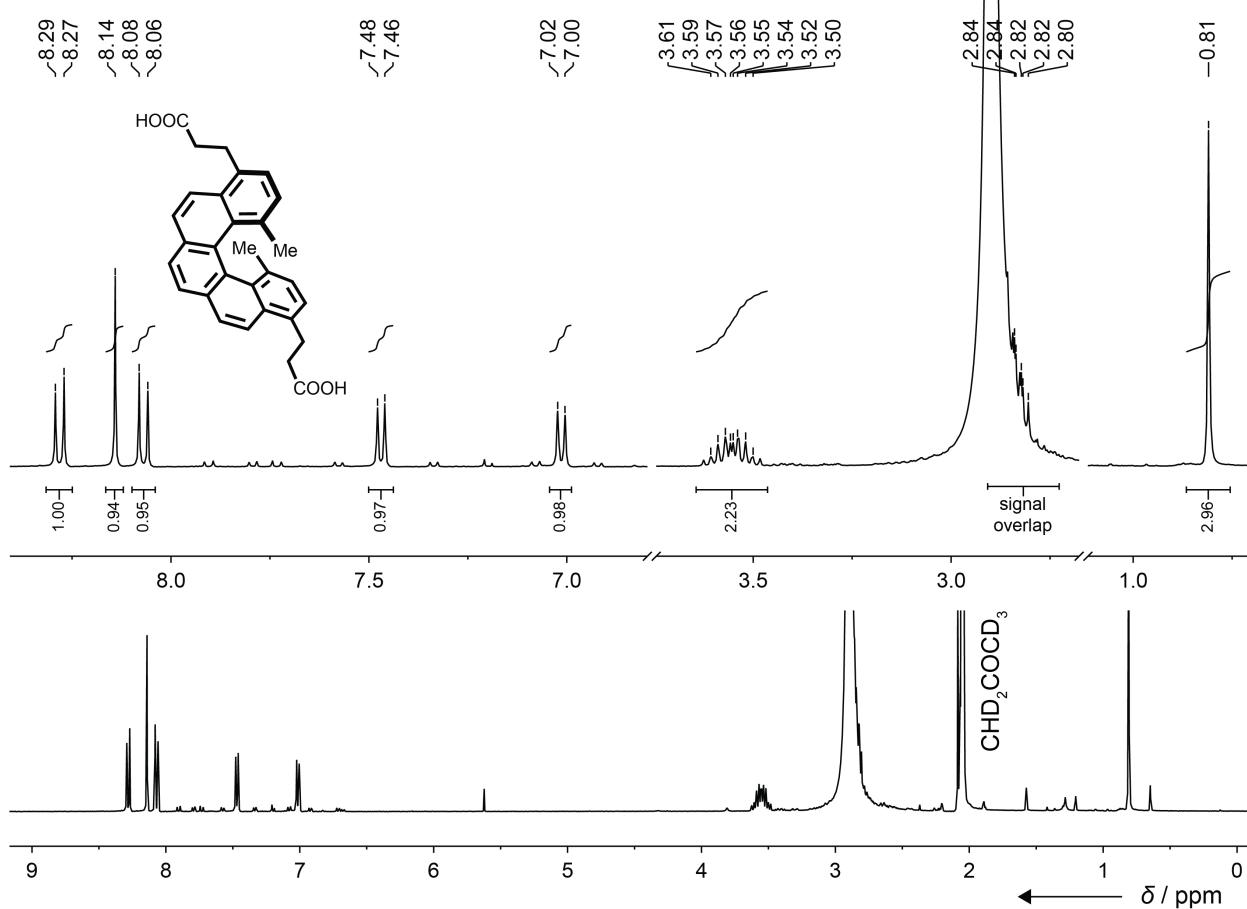

$^{13}\text{C NMR}$  / 101 MHz /  $\text{CD}_3\text{COCD}_3$

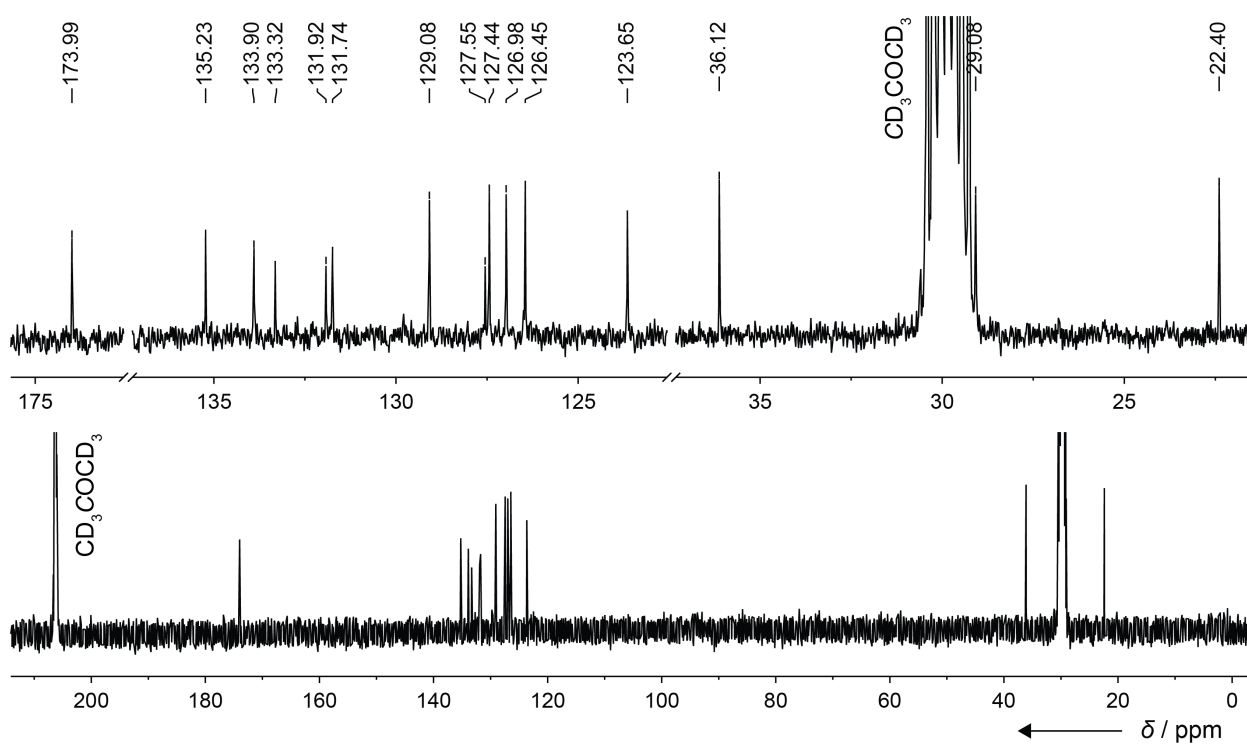

(±)-13,14-Dimethyl-1,2,9,10-tetrahydrodibenzo[*pq,uv*]pentaphene-3,8-dione (7)

<sup>1</sup>H NMR / 500 MHz / CD<sub>2</sub>Cl<sub>2</sub>

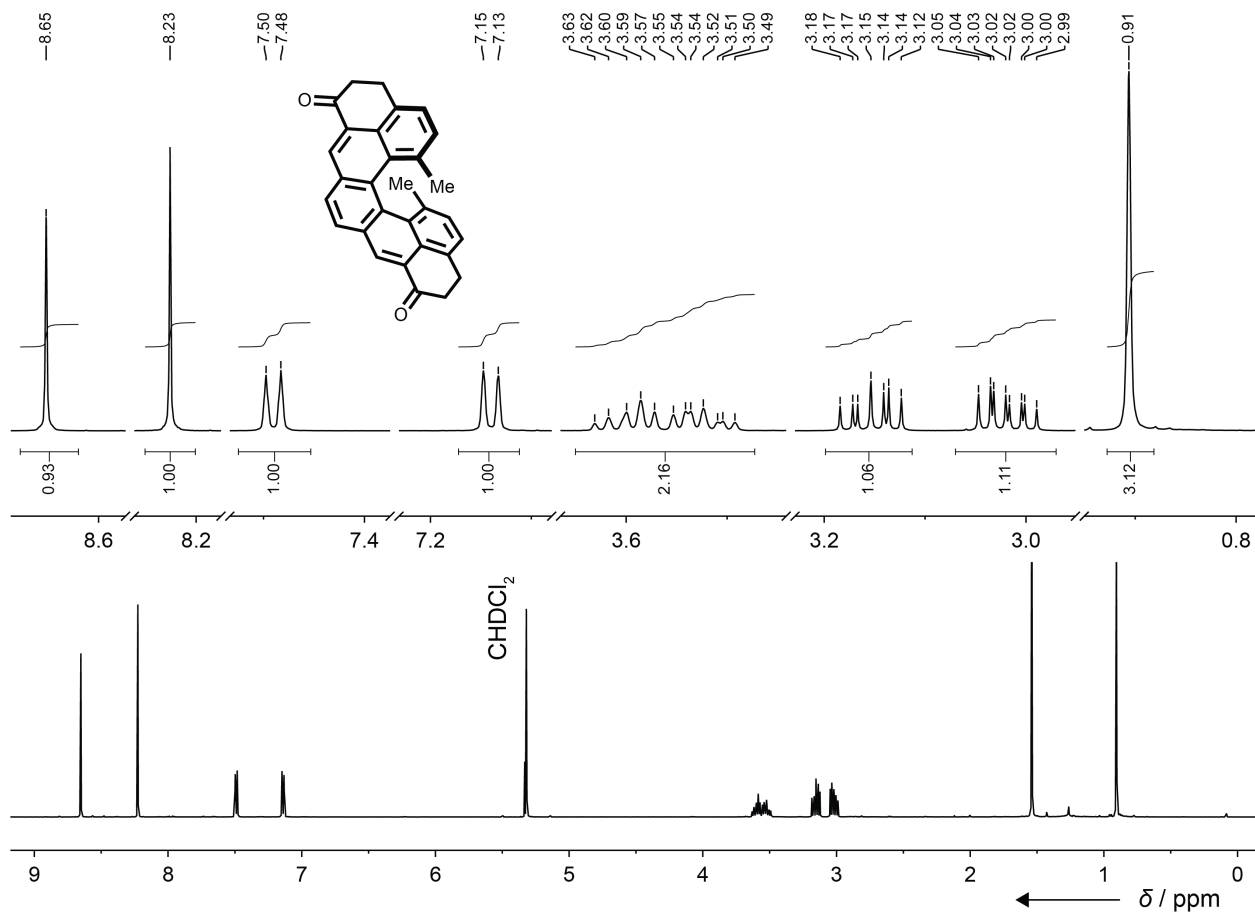

<sup>13</sup>C NMR / 101 MHz / CD<sub>2</sub>Cl<sub>2</sub>

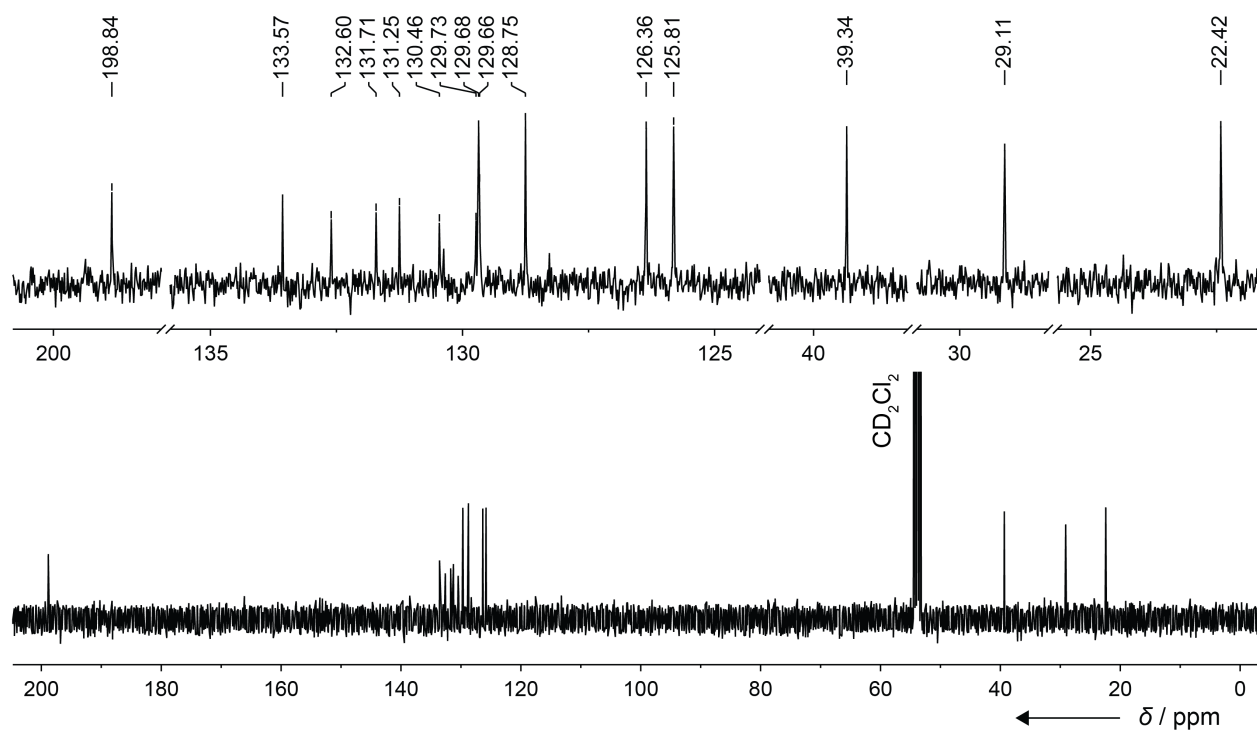

$^1\text{H}$ - $^1\text{H}$  COSY NMR / 500 MHz /  $\text{CD}_2\text{Cl}_2$

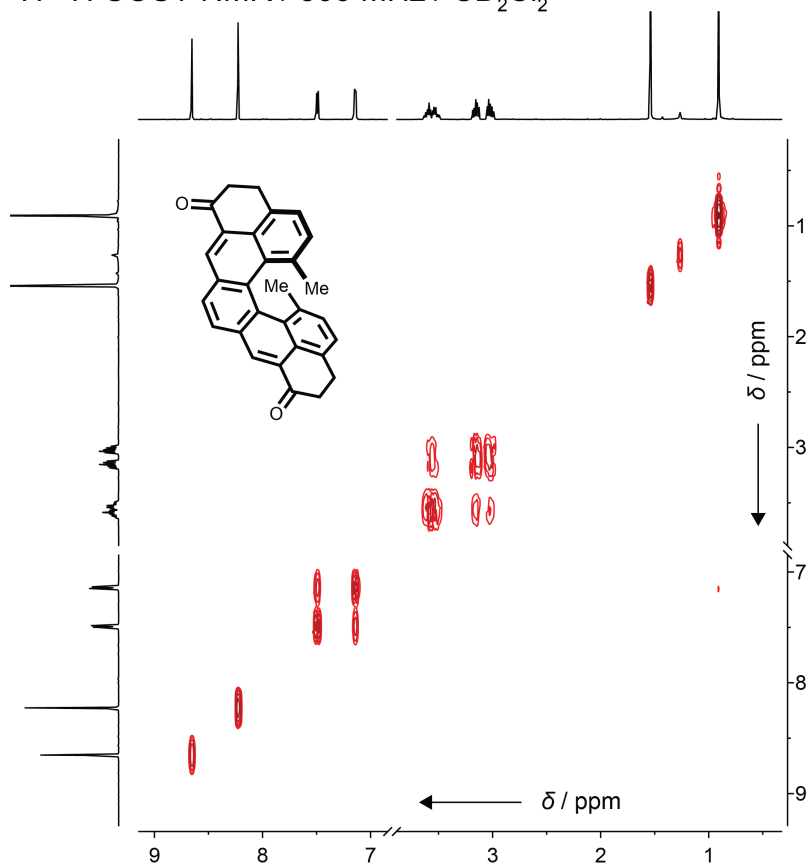

$^1\text{H}$ - $^1\text{H}$  NOESY NMR / 500 MHz /  $\text{CD}_2\text{Cl}_2$

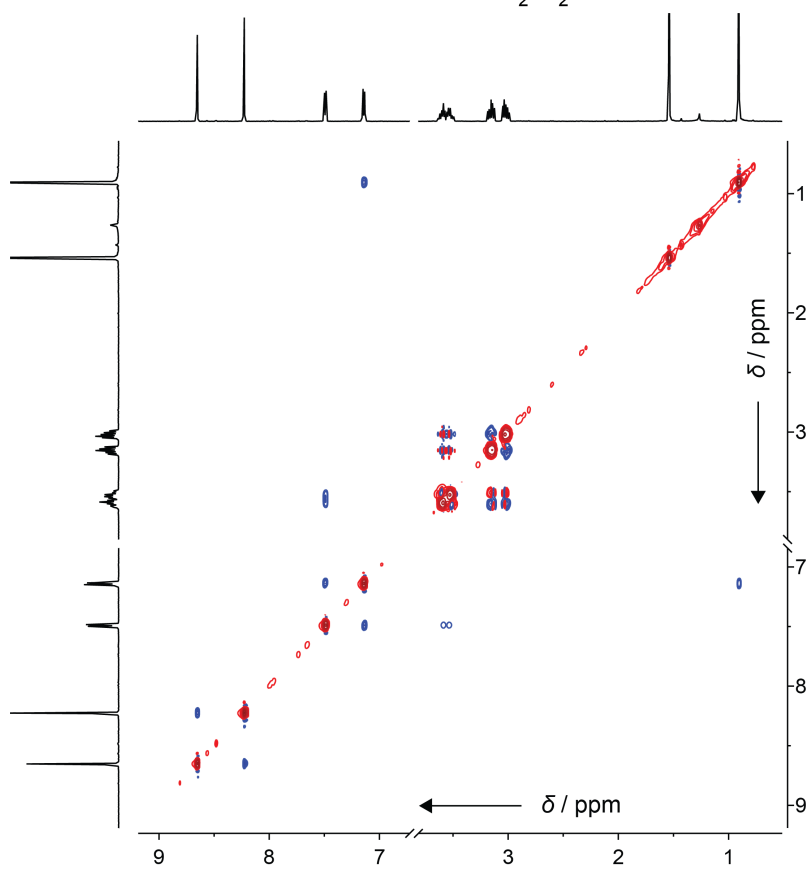

$^1\text{H}$ - $^{13}\text{C}$  HMQC NMR / 500 MHz /  $\text{CD}_2\text{Cl}_2$

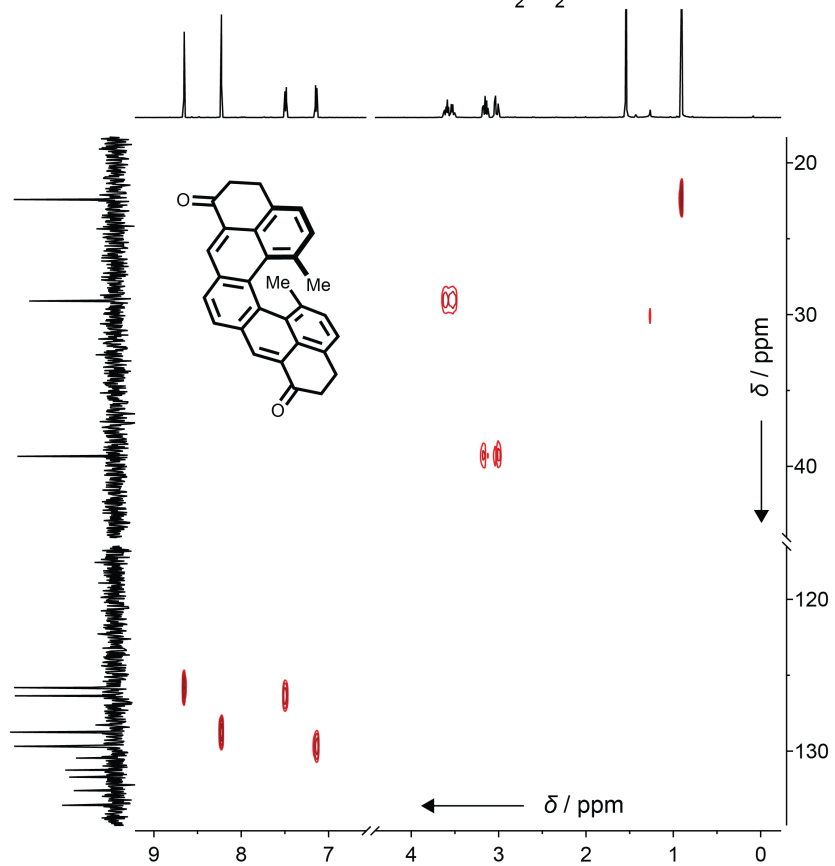

$^1\text{H}$ - $^{13}\text{C}$  HMBC NMR / 500 MHz /  $\text{CD}_2\text{Cl}_2$

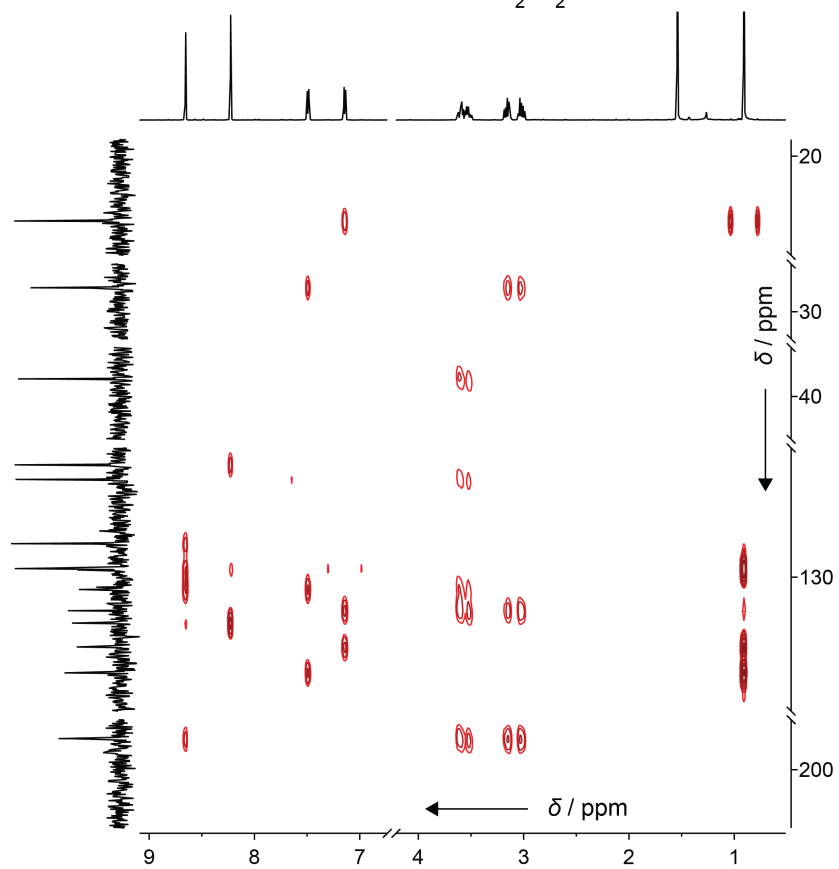

(±)-13,14-Dimethyl-1,10-dihydrodibenzo[*pq,uv*]pentaphene (**8**)

$^1\text{H NMR}$  / 500 MHz /  $\text{CD}_2\text{Cl}_2$

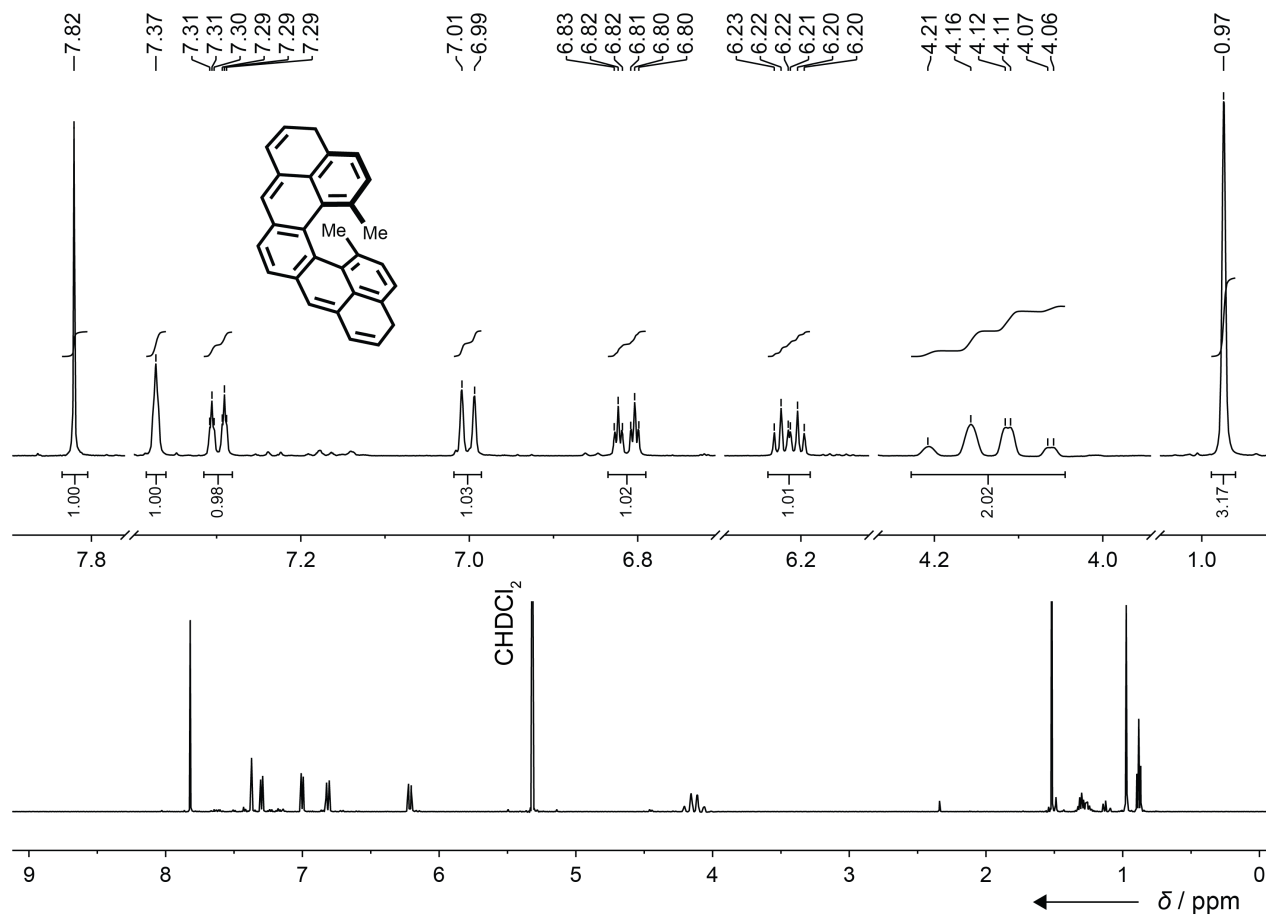

$^{13}\text{C NMR}$  / 126 MHz /  $\text{CD}_2\text{Cl}_2$

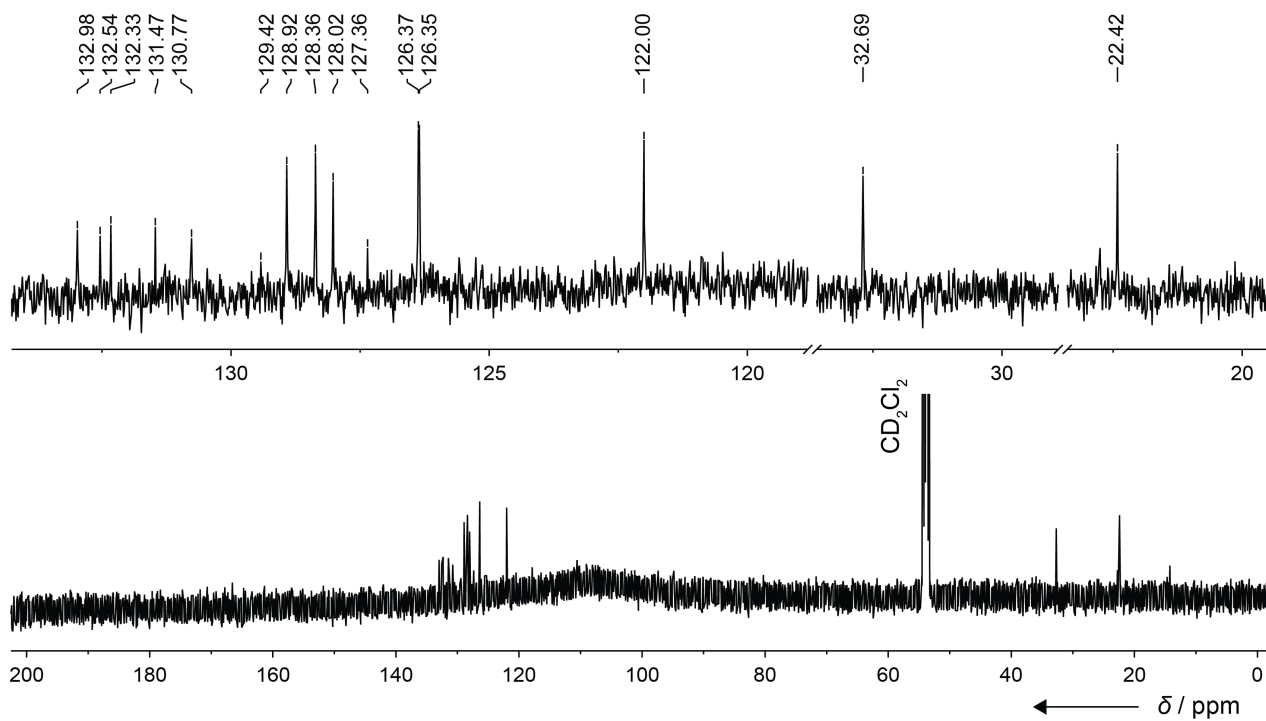



$^1\text{H}$ - $^1\text{H}$  COSY NMR / 500 MHz /  $\text{CD}_2\text{Cl}_2$

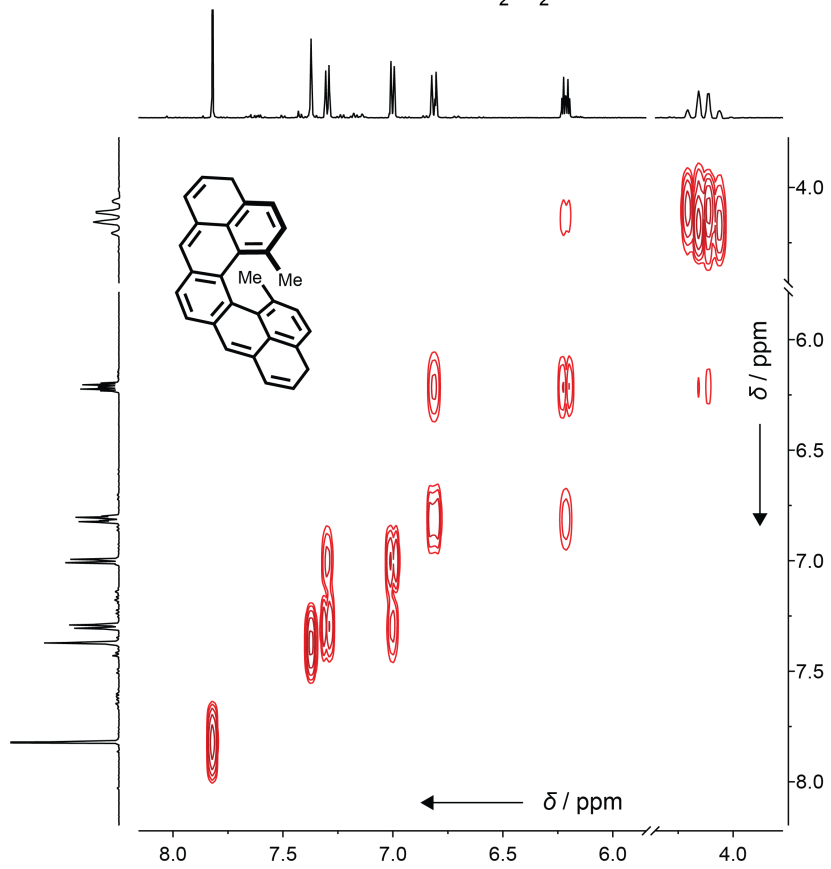

$^1\text{H}$ - $^1\text{H}$  NOESY NMR / 500 MHz /  $\text{CD}_2\text{Cl}_2$

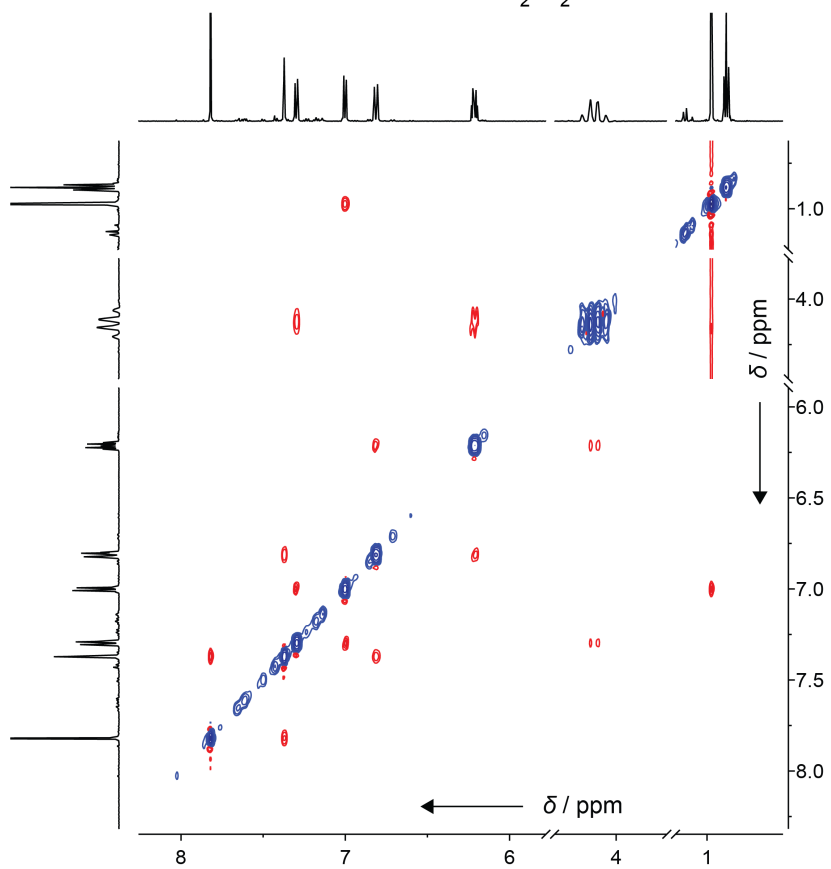

$^1\text{H}$ - $^{13}\text{C}$  HMQC NMR / 500 MHz /  $\text{CD}_2\text{Cl}_2$

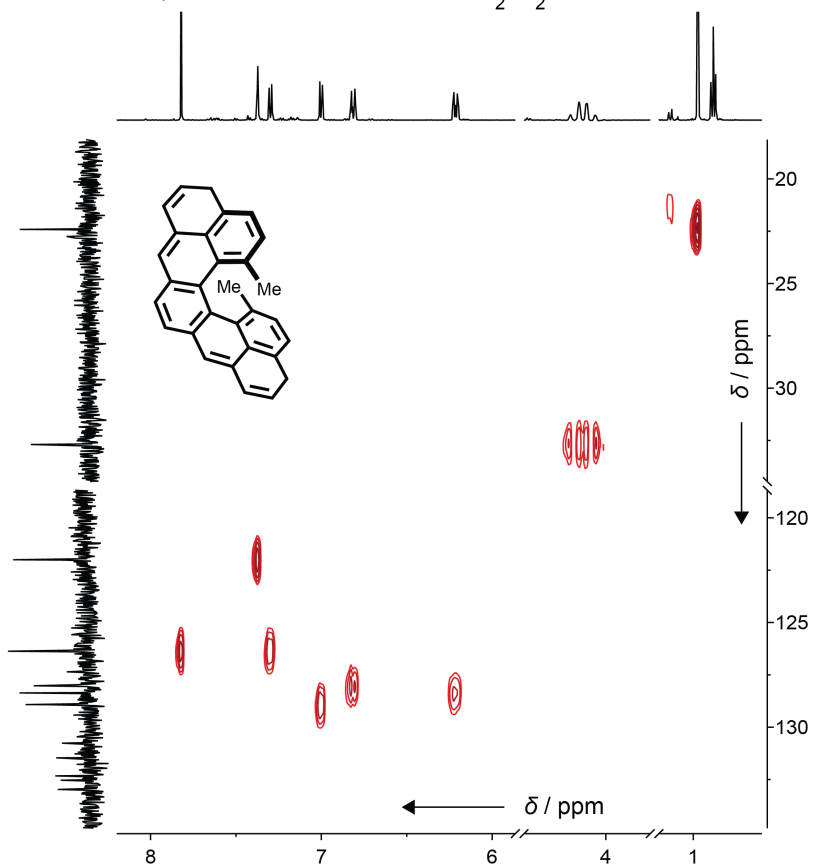

$^1\text{H}$ - $^{13}\text{C}$  HMBC NMR / 500 MHz /  $\text{CD}_2\text{Cl}_2$

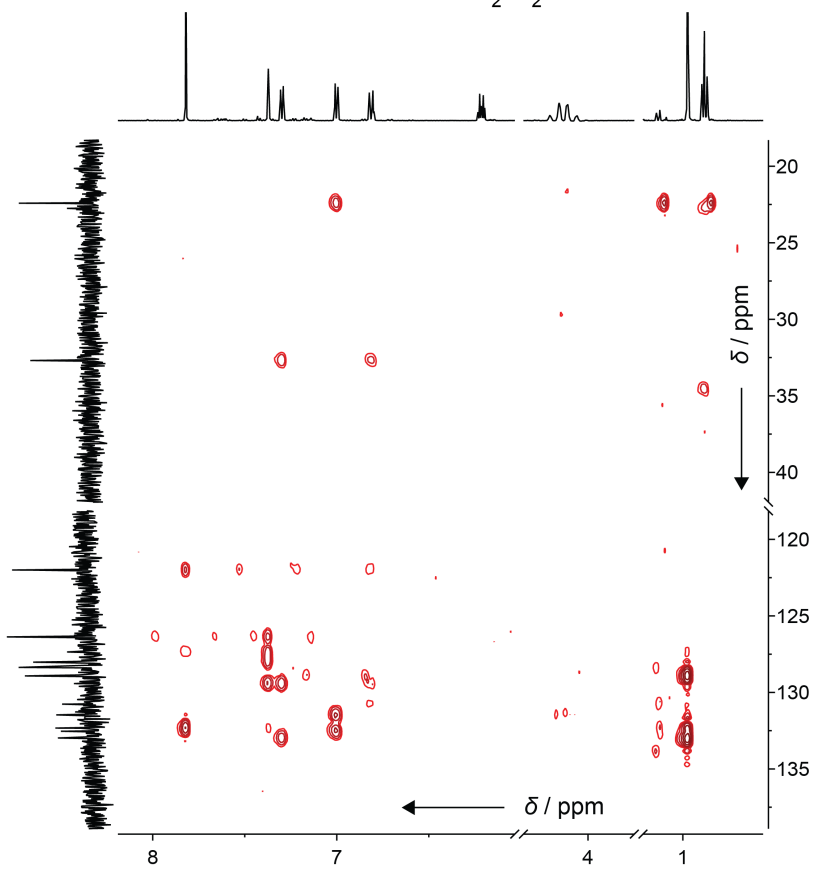

(±)-(12a*R*,12b*R*)-12a,12b-Dimethyl-12a,12b-dihydrophenanthro[2,1,10,9,8,7-*pqrstuv*]pentaphene  
(c-1b)

$^1\text{H}$  NMR / 500 MHz /  $\text{C}_6\text{D}_6$

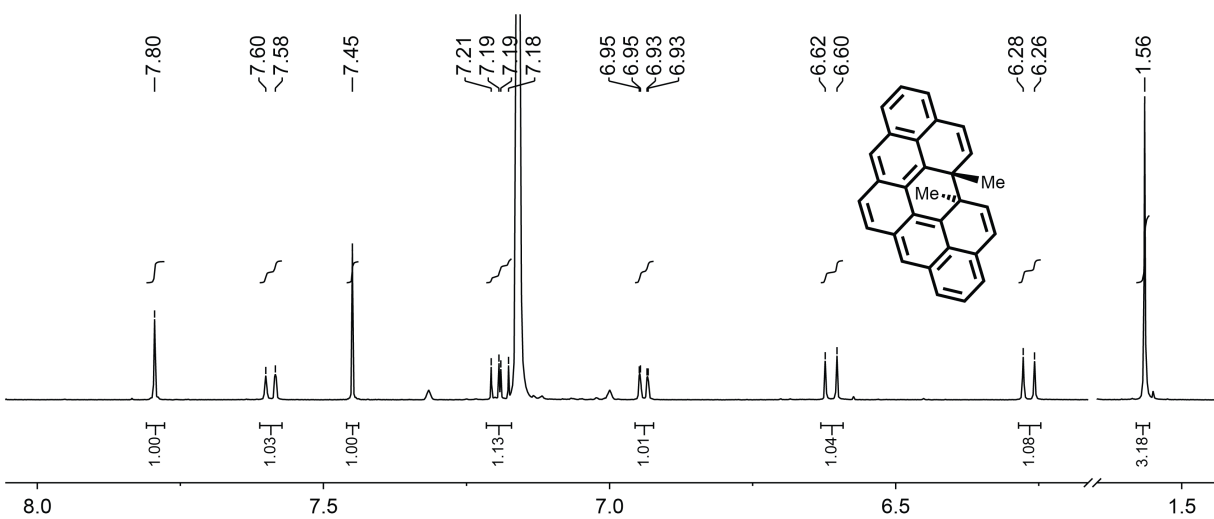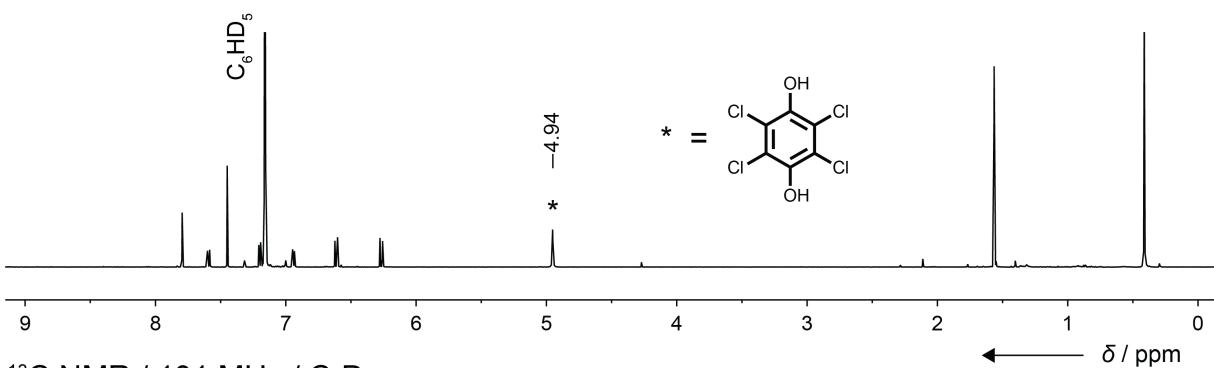

$^{13}\text{C}$  NMR / 101 MHz /  $\text{C}_6\text{D}_6$

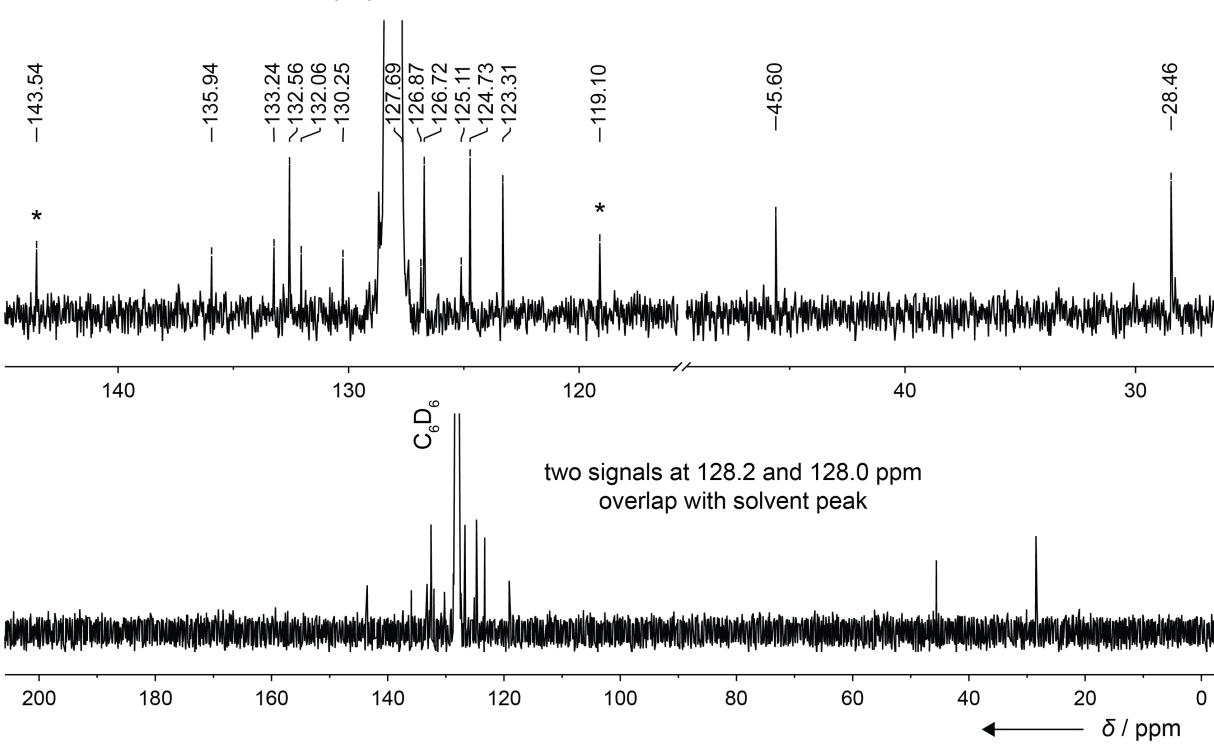

$^1\text{H}$ - $^1\text{H}$  COSY NMR / 500 MHz /  $\text{C}_6\text{D}_6$

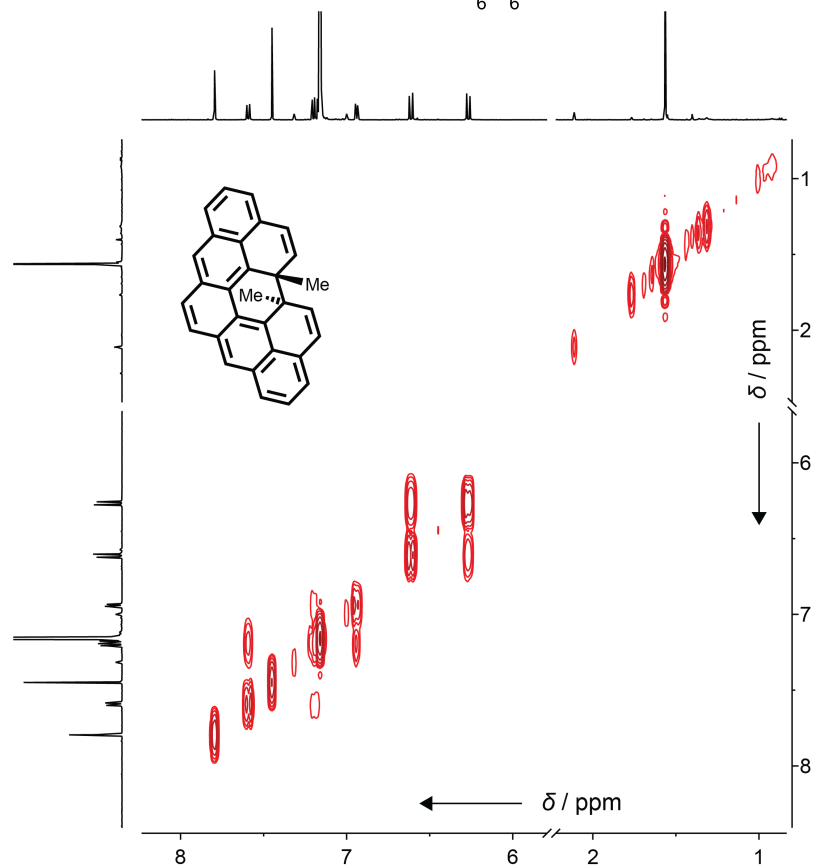

$^1\text{H}$ - $^1\text{H}$  NOESY NMR / 500 MHz /  $\text{C}_6\text{D}_6$

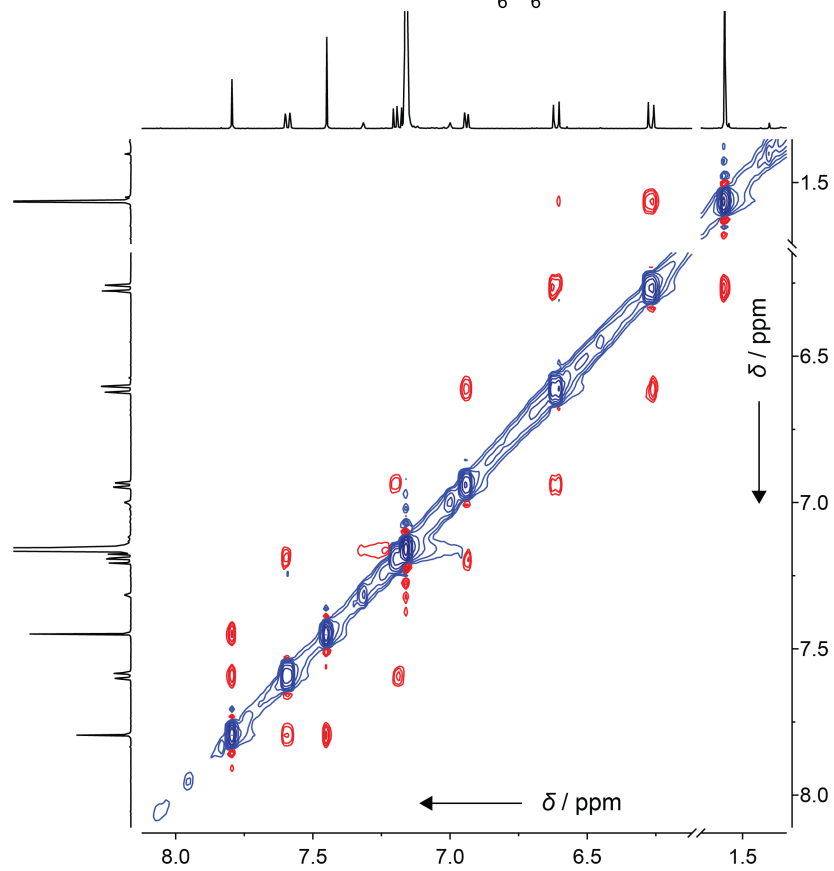

$^1\text{H}$ - $^{13}\text{C}$  HMQC NMR / 500 MHz /  $\text{C}_6\text{D}_6$

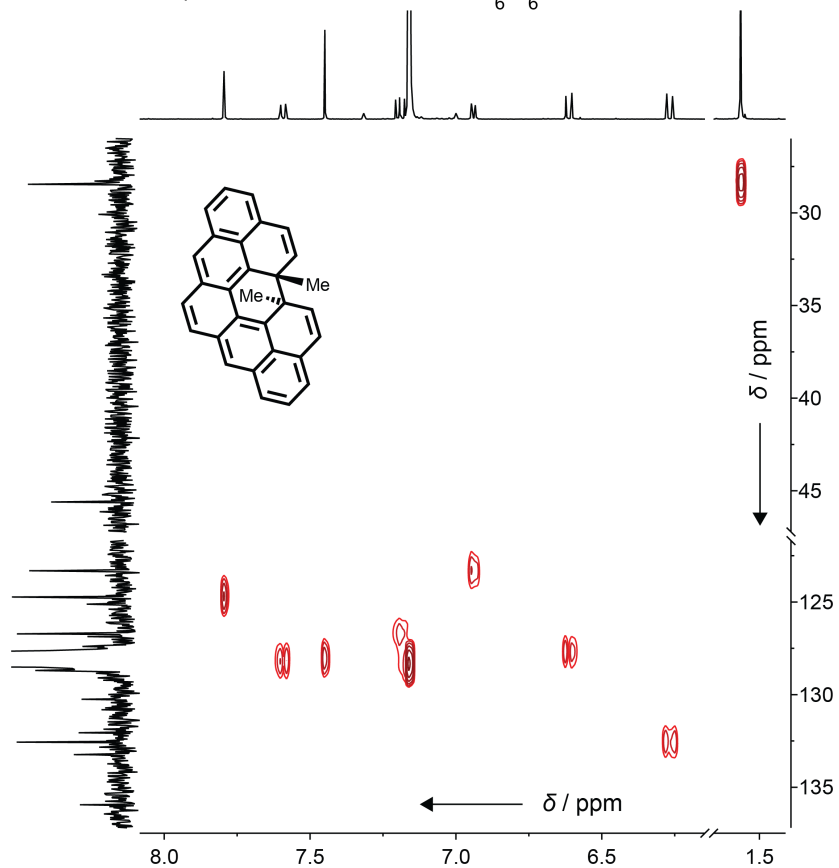

$^1\text{H}$ - $^{13}\text{C}$  HMBC NMR / 500 MHz /  $\text{C}_6\text{D}_6$

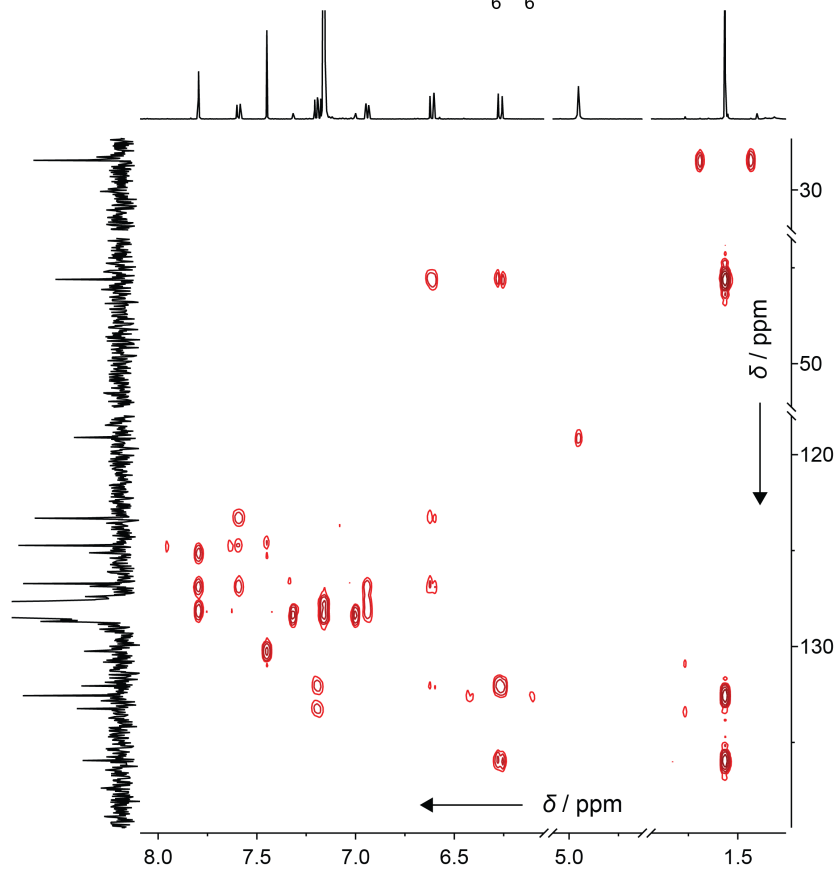

# 13,14-Dimethyldibenzo[*pq,uv*]pentaphene (o-1b)

$^1\text{H}$  NMR / 600 MHz /  $\text{C}_6\text{D}_6$

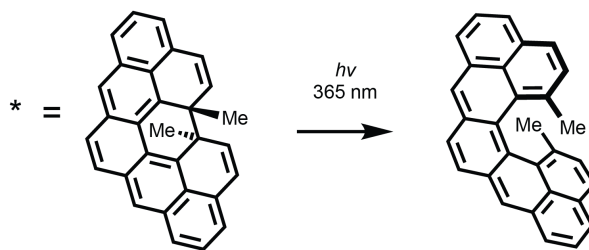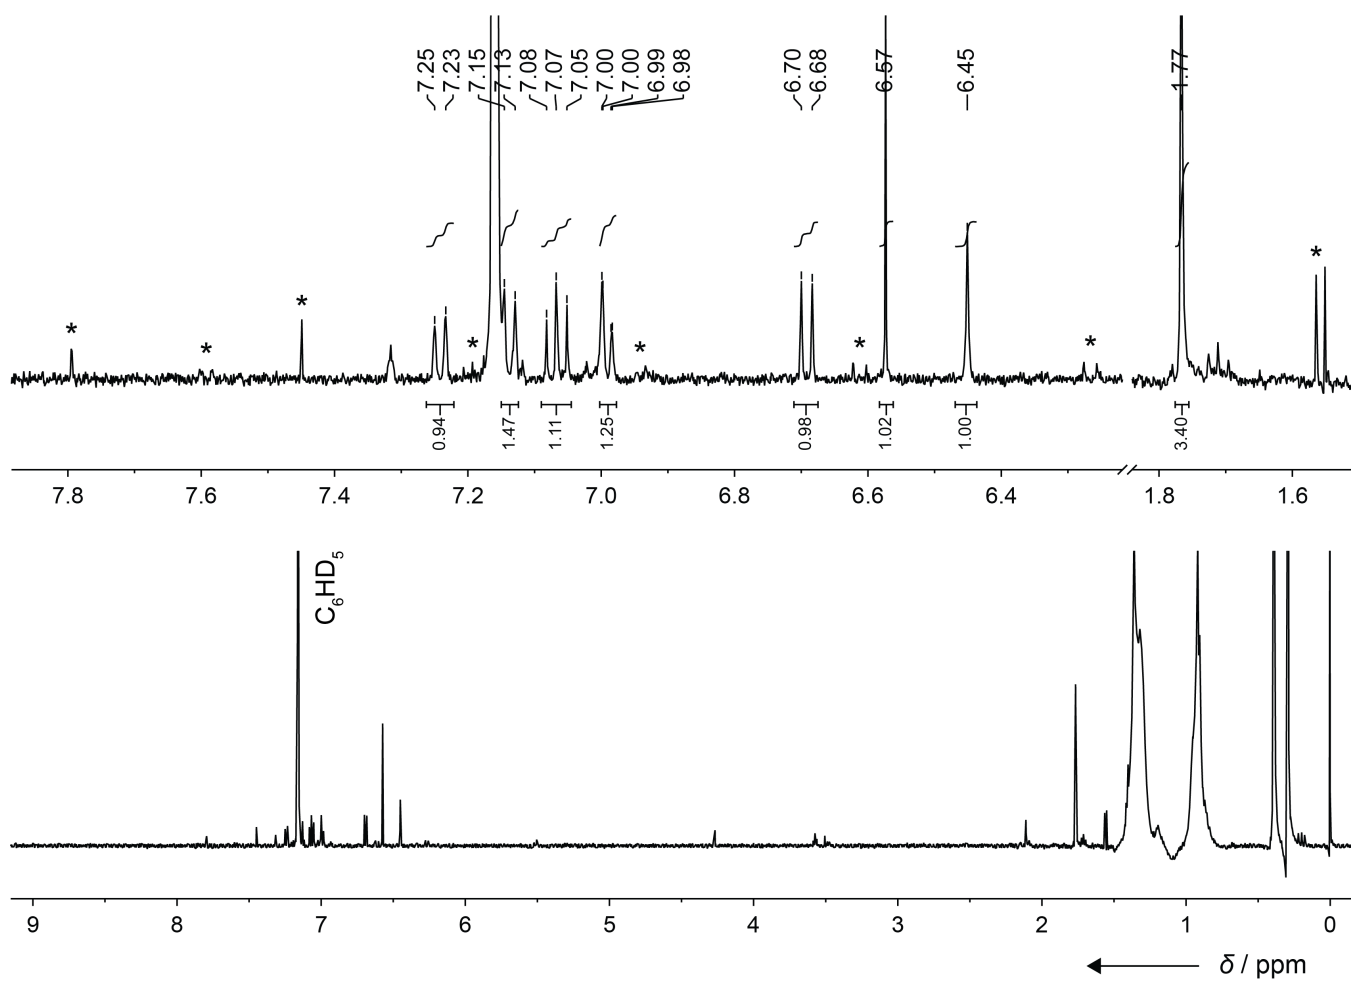

$^1\text{H}$ - $^1\text{H}$  COSY NMR / 600 MHz /  $\text{C}_6\text{D}_6$

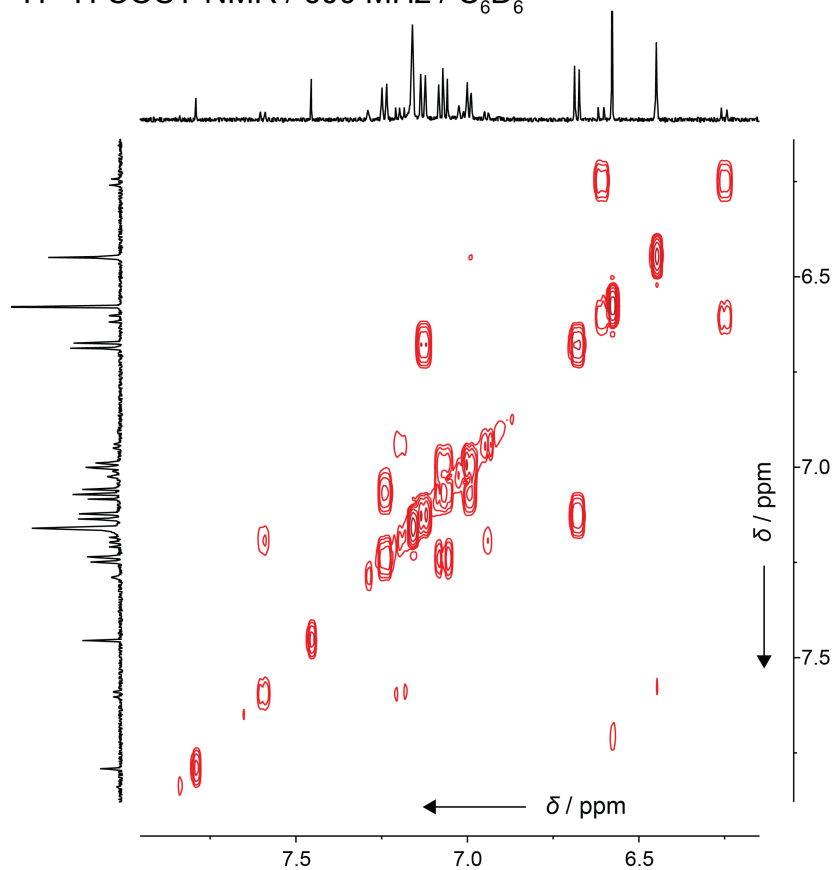

$^1\text{H}$ - $^1\text{H}$  NOESY NMR / 600 MHz /  $\text{C}_6\text{D}_6$

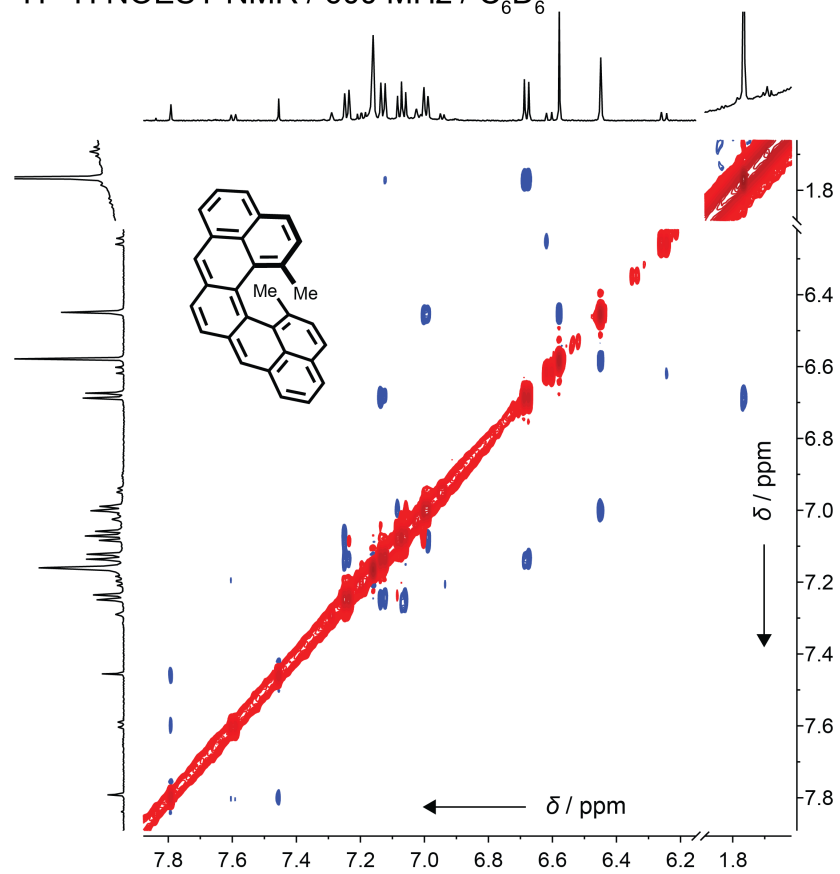

$^1\text{H}$ - $^{13}\text{C}$  HSQC NMR / 600 MHz /  $\text{C}_6\text{D}_6$

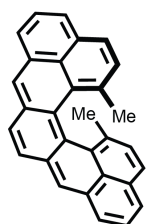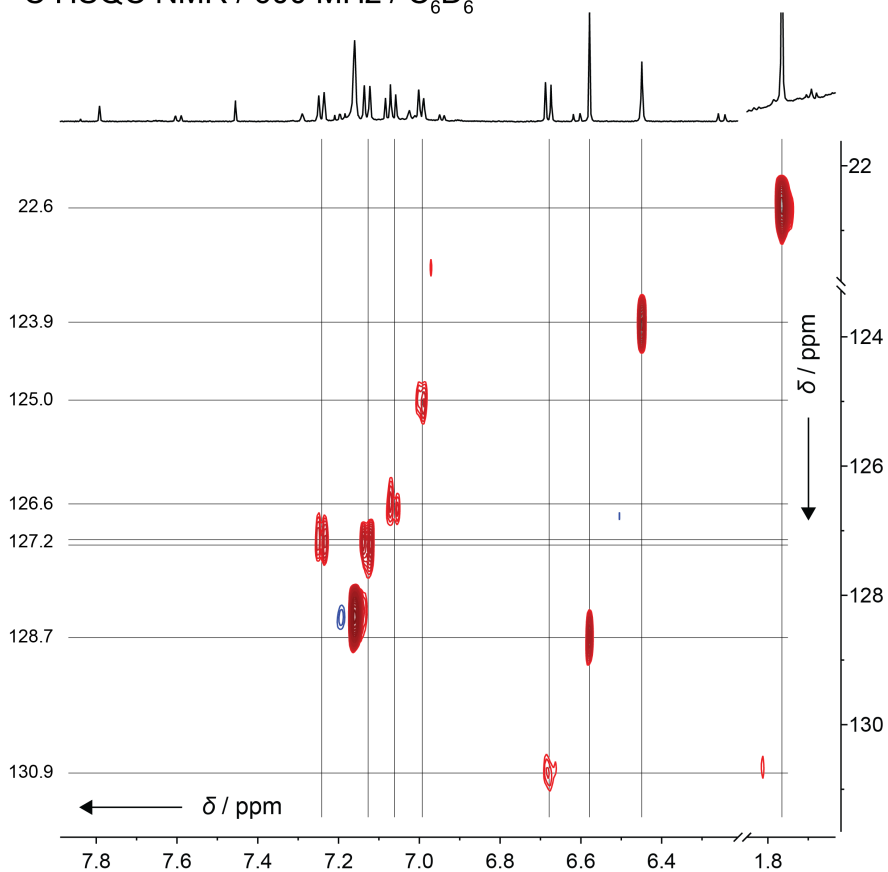

$^1\text{H}$ - $^{13}\text{C}$  HMBC NMR / 600 MHz /  $\text{C}_6\text{D}_6$

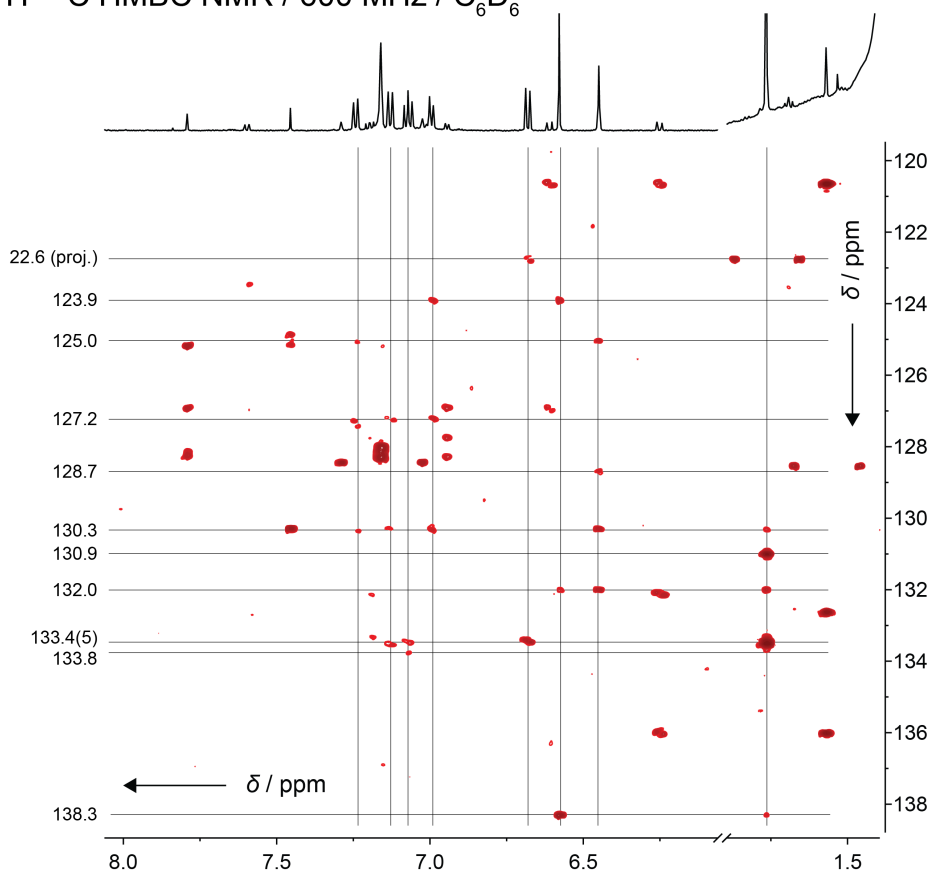



# S9. Copies of HRMS Spectra

## Mass Spectrum SmartFormula Report

### Analysis Info

Analysis Name E:\new acq data for data analysis\PR199 001.d  
 Method hn Direct\_Infusion\_pos mode\_75-1700 low 4eV.m  
 Sample Name Prince Ravat  
 Comment PR199, ca 50 ug/ml MeCN/DCM 1:1, mit MeCN/TFA

Acquisition Date 19.10.2016 17:16:46

Operator hn  
 Instrument / Ser# maXis 4G 21243

### Acquisition Parameter

|             |            |                       |           |                            |           |
|-------------|------------|-----------------------|-----------|----------------------------|-----------|
| Source Type | ESI        | Ion Polarity          | Positive  | Set Nebulizer              | 0.4 Bar   |
| Focus       | Not active | Set Capillary         | 3600 V    | Set Dry Heater             | 180 °C    |
| Scan Begin  | 75 m/z     | Set End Plate Offset  | -500 V    | Set Dry Gas                | 3.0 l/min |
| Scan End    | 1700 m/z   | Set Collision Cell RF | 350.0 Vpp | Set Ion Energy ( MS only ) | 4.0 eV    |

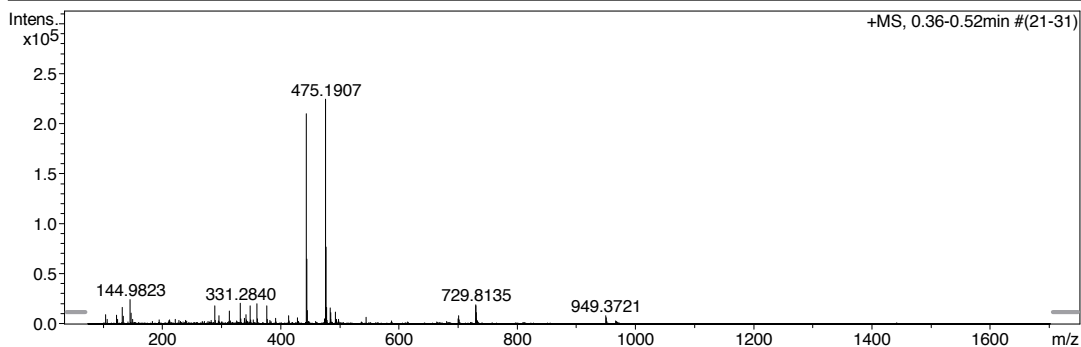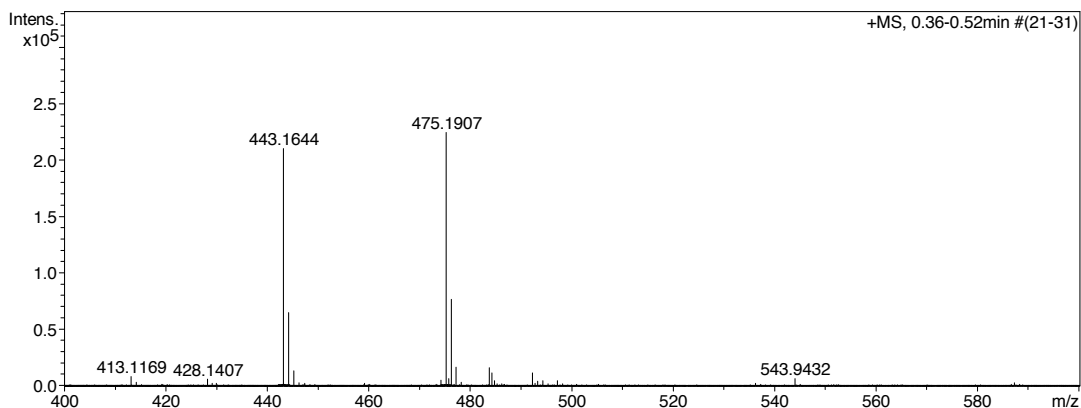

| Meas. m/z | # | Formula       | Score  | m/z      | err [mDa] | err [ppm] | mSigma | rdb  | e <sup>-</sup> Conf | N-Rule | z  |
|-----------|---|---------------|--------|----------|-----------|-----------|--------|------|---------------------|--------|----|
| 443.1644  | 1 | C 31 H 23 O 3 | 100.00 | 443.1642 | -0.2      | -0.5      | 14.5   | 20.5 | even                | ok     | 1+ |
| 475.1907  | 1 | C 32 H 27 O 4 | 100.00 | 475.1904 | -0.3      | -0.6      | 4.1    | 19.5 | even                | ok     |    |
| 949.3721  | 1 | C 64 H 53 O 8 | 100.00 | 949.3735 | 1.4       | 1.5       | 10.8   | 38.5 | even                | ok     |    |

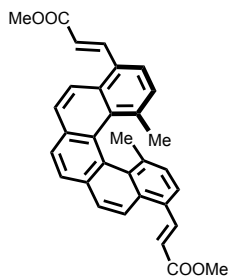

# Mass Spectrum SmartFormula Report

## Analysis Info

Analysis Name E:\new acq data for data analysis\PR200 002.d  
Method hn Direct\_Infusion\_pos mode\_75-1700 low 4eV.m  
Sample Name Prince Ravat  
Comment PR200, ca 50 ug/ml MeCN/DCM 9:1, mit MeOH/NaOAc

Acquisition Date 19.10.2016 17:51:13

Operator hn  
Instrument / Ser# maXis 4G 21243

## Acquisition Parameter

|             |            |                       |           |                            |           |
|-------------|------------|-----------------------|-----------|----------------------------|-----------|
| Source Type | ESI        | Ion Polarity          | Positive  | Set Nebulizer              | 0.4 Bar   |
| Focus       | Not active | Set Capillary         | 3600 V    | Set Dry Heater             | 180 °C    |
| Scan Begin  | 75 m/z     | Set End Plate Offset  | -500 V    | Set Dry Gas                | 3.0 l/min |
| Scan End    | 1700 m/z   | Set Collision Cell RF | 350.0 Vpp | Set Ion Energy ( MS only ) | 4.0 eV    |

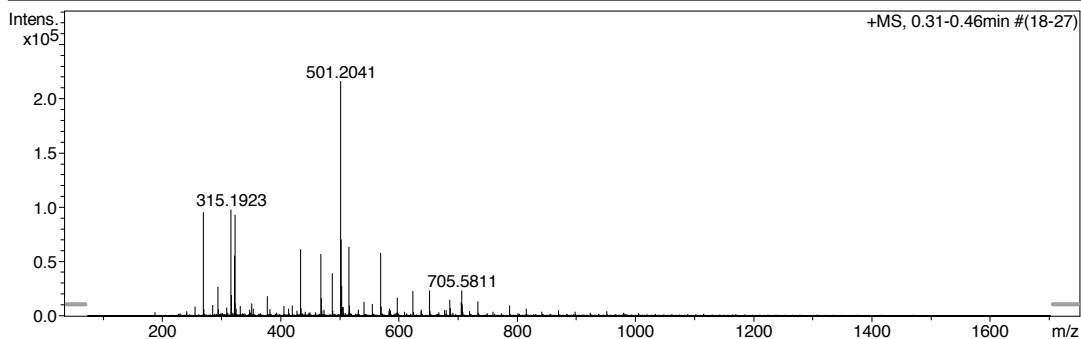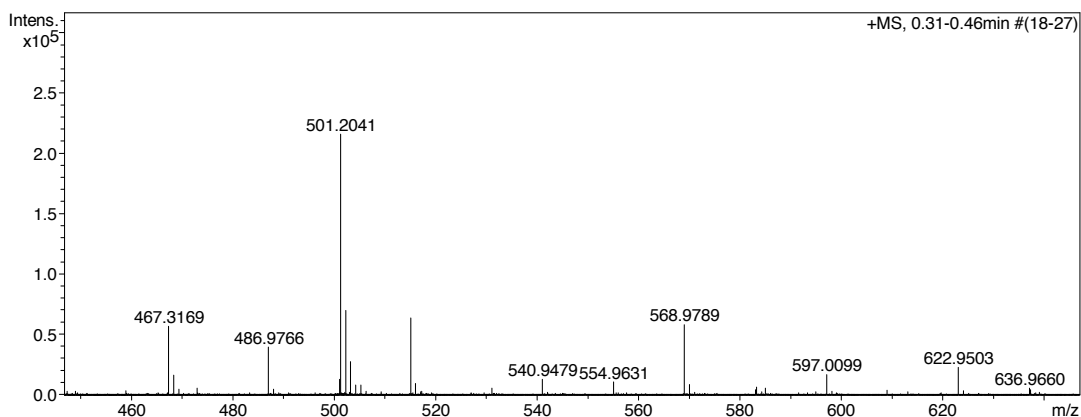

| Meas. m/z | # | Formula          | Score  | m/z      | err [mDa] | err [ppm] | mSigma | rdb  | e <sup>-</sup> Conf | N-Rule | z  |
|-----------|---|------------------|--------|----------|-----------|-----------|--------|------|---------------------|--------|----|
| 501.2041  | 1 | C 32 H 30 Na O 4 | 100.00 | 501.2036 | -0.5      | -0.9      | 34.2   | 17.5 | even                | ok     | 1+ |

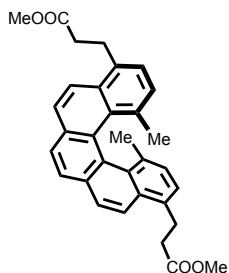

# Mass Spectrum SmartFormula Report

**Analysis Info**

Analysis Name E:\new acq data for data analysis\PR201 001.d  
 Method hn Direct\_Infusion\_pos mode\_75-1700 mid 4eV.m  
 Sample Name Prince Ravat  
 Comment PR201, ca. 50 ug/ml ACN/DCM (9:1)

Acquisition Date 04.11.2016 17:33:23

Operator hn  
 Instrument / Ser# maXis 4G 21243

**Acquisition Parameter**

|             |            |                       |           |                            |           |
|-------------|------------|-----------------------|-----------|----------------------------|-----------|
| Source Type | ESI        | Ion Polarity          | Positive  | Set Nebulizer              | 0.4 Bar   |
| Focus       | Not active | Set Capillary         | 3600 V    | Set Dry Heater             | 180 °C    |
| Scan Begin  | 75 m/z     | Set End Plate Offset  | -500 V    | Set Dry Gas                | 4.0 l/min |
| Scan End    | 1700 m/z   | Set Collision Cell RF | 350.0 Vpp | Set Ion Energy ( MS only ) | 4.0 eV    |

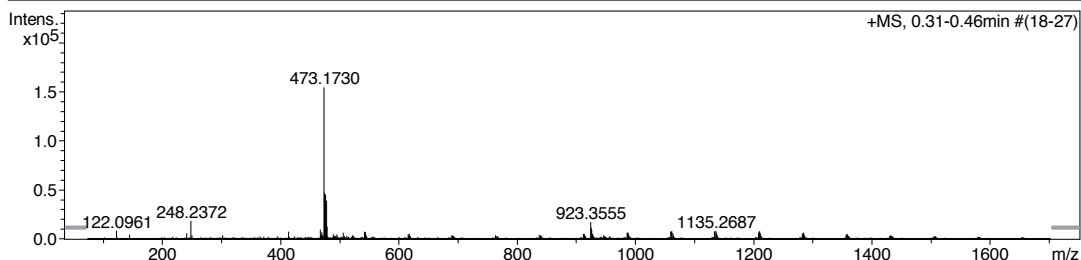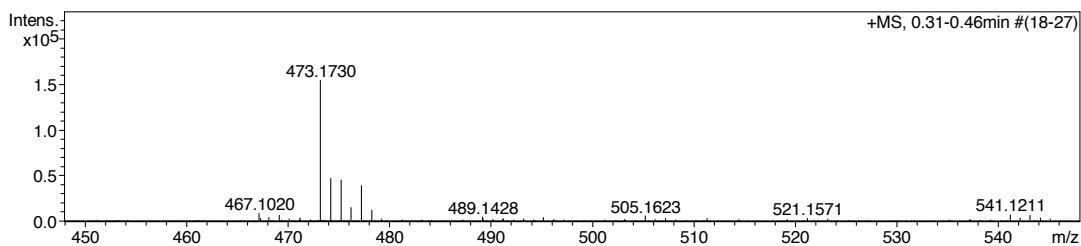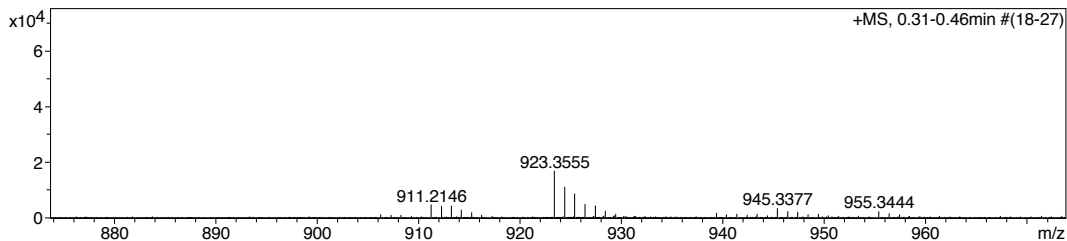

| Meas. m/z | # | Formula          | Score  | m/z      | err [mDa] | err [ppm] | mSigma | rdb  | e <sup>-</sup> Conf | z  |
|-----------|---|------------------|--------|----------|-----------|-----------|--------|------|---------------------|----|
| 473.1730  | 1 | C 30 H 26 Na O 4 | 100.00 | 473.1723 | -0.6      | -1.4      | 117.8  | 17.5 | even                | 1+ |
| 923.3555  | 1 | C 60 H 52 Na O 8 | 100.00 | 923.3554 | -0.0      | -0.0      | 197.9  | 34.5 | even                |    |

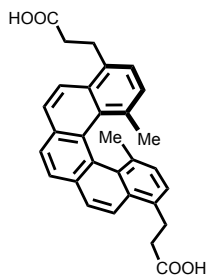

## Mass Spectrum SmartFormula Report

**Analysis Info**

Analysis Name E:\new acq data for data analysis\PR202 001.d  
 Method hn Direct\_Infusion\_pos mode\_75-1700 low 4eV.m  
 Sample Name Prince Ravat  
 Comment PR202, ca 50 ug/ml MeCN/DCM 9:1, mit MeCN/TFA

Acquisition Date 19.10.2016 15:54:04

Operator hn  
 Instrument / Ser# maXis 4G 21243

**Acquisition Parameter**

|             |            |                       |           |                            |           |
|-------------|------------|-----------------------|-----------|----------------------------|-----------|
| Source Type | ESI        | Ion Polarity          | Positive  | Set Nebulizer              | 0.4 Bar   |
| Focus       | Not active | Set Capillary         | 3600 V    | Set Dry Heater             | 180 °C    |
| Scan Begin  | 75 m/z     | Set End Plate Offset  | -500 V    | Set Dry Gas                | 3.0 l/min |
| Scan End    | 1700 m/z   | Set Collision Cell RF | 350.0 Vpp | Set Ion Energy ( MS only ) | 4.0 eV    |

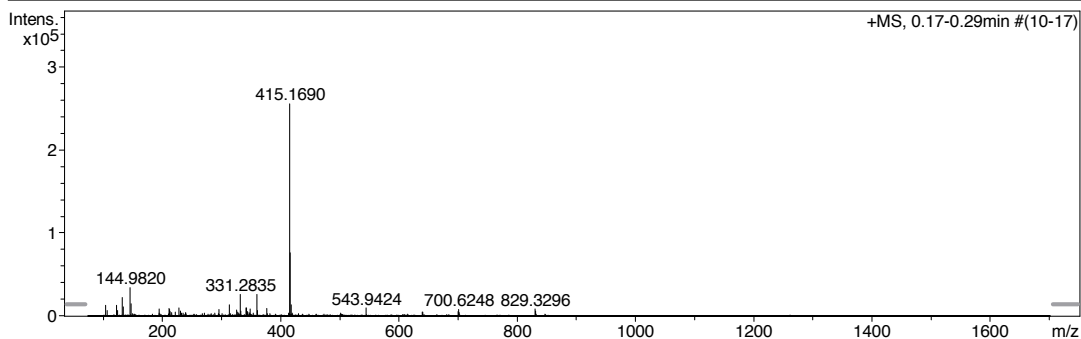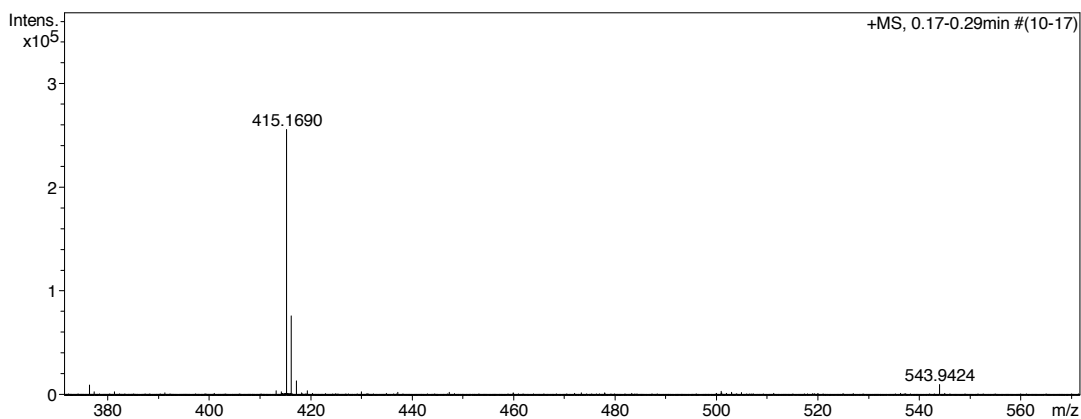

| Meas. m/z | # | Formula       | Score  | m/z      | err [mDa] | err [ppm] | mSigma | rdb  | e <sup>-</sup> Conf | N-Rule | z  |
|-----------|---|---------------|--------|----------|-----------|-----------|--------|------|---------------------|--------|----|
| 415.1690  | 1 | C 30 H 23 O 2 | 100.00 | 415.1693 | 0.3       | 0.7       | 14.1   | 19.5 | even                | ok     | 1+ |
| 829.3296  | 1 | C 60 H 45 O 4 | 100.00 | 829.3312 | 1.7       | 2.0       | 5.9    | 38.5 | even                | ok     |    |

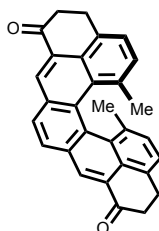

# Mass Spectrum SmartFormula Report

**Analysis Info**

Analysis Name E:\new acq data for data analysis\PR284 002.d  
 Method hn Direct\_Infusion\_pos mode\_75-700 low 4eV.m  
 Sample Name Prince Ravat  
 Comment PR284, ca.50 ug /ml MeCN

Acquisition Date 10.01.2017 17:36:20

Operator hn  
 Instrument / Ser# maXis 4G 21243

**Acquisition Parameter**

|             |            |                      |          |                            |           |
|-------------|------------|----------------------|----------|----------------------------|-----------|
| Source Type | ESI        | Ion Polarity         | Positive | Set Nebulizer              | 0.4 Bar   |
| Focus       | Not active | Set Capillary        | 3600 V   | Set Dry Heater             | 180 °C    |
| Scan Begin  | 75 m/z     | Set End Plate Offset | -500 V   | Set Dry Gas                | 3.0 l/min |
| Scan End    | 1200 m/z   | Collision Energy     | 8.0 eV   | Set Ion Energy ( MS only ) | 4.0 eV    |

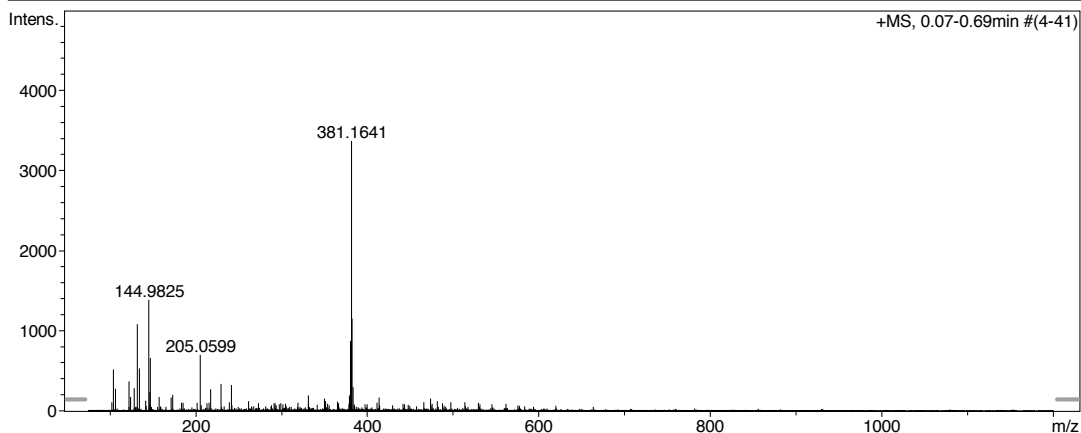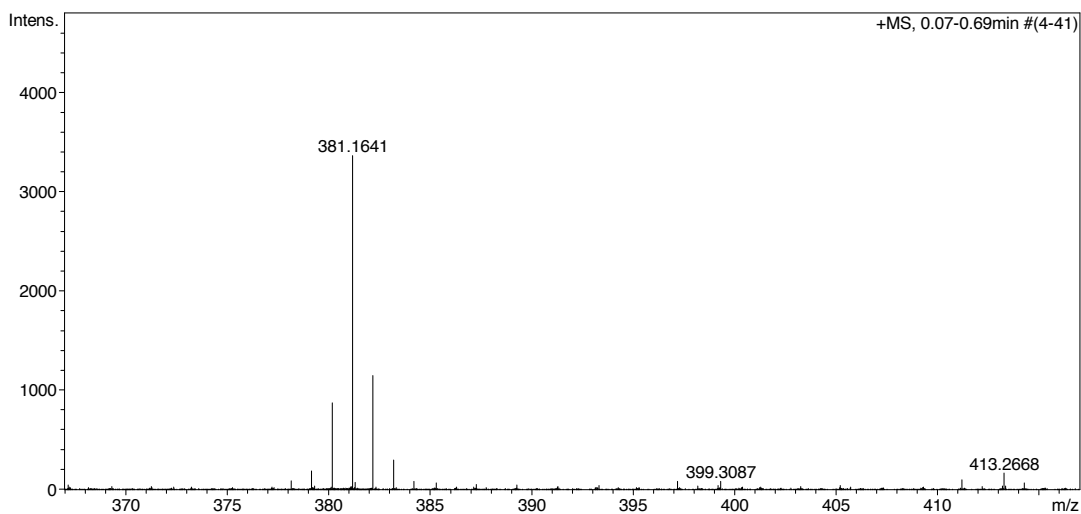

| Meas. m/z | # | Formula                         | Score  | m/z      | err [mDa] | err [ppm] | mSigma | rdb  | e <sup>-</sup> Conf | z  |
|-----------|---|---------------------------------|--------|----------|-----------|-----------|--------|------|---------------------|----|
| 381.1641  | 1 | C <sub>30</sub> H <sub>21</sub> | 100.00 | 381.1638 | -0.3      | -0.8      | 20.1   | 20.5 | even                | 1+ |

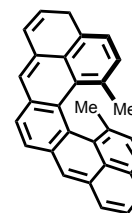

HR-El-Report (Thermo DFS)

Client:

Sample: 3433juhr-cmass1 #1-44 RT: 0.00-4.74 AV: 44 NL: 5.80E4  
 T: + c EI Full ms [365.50-394.50]

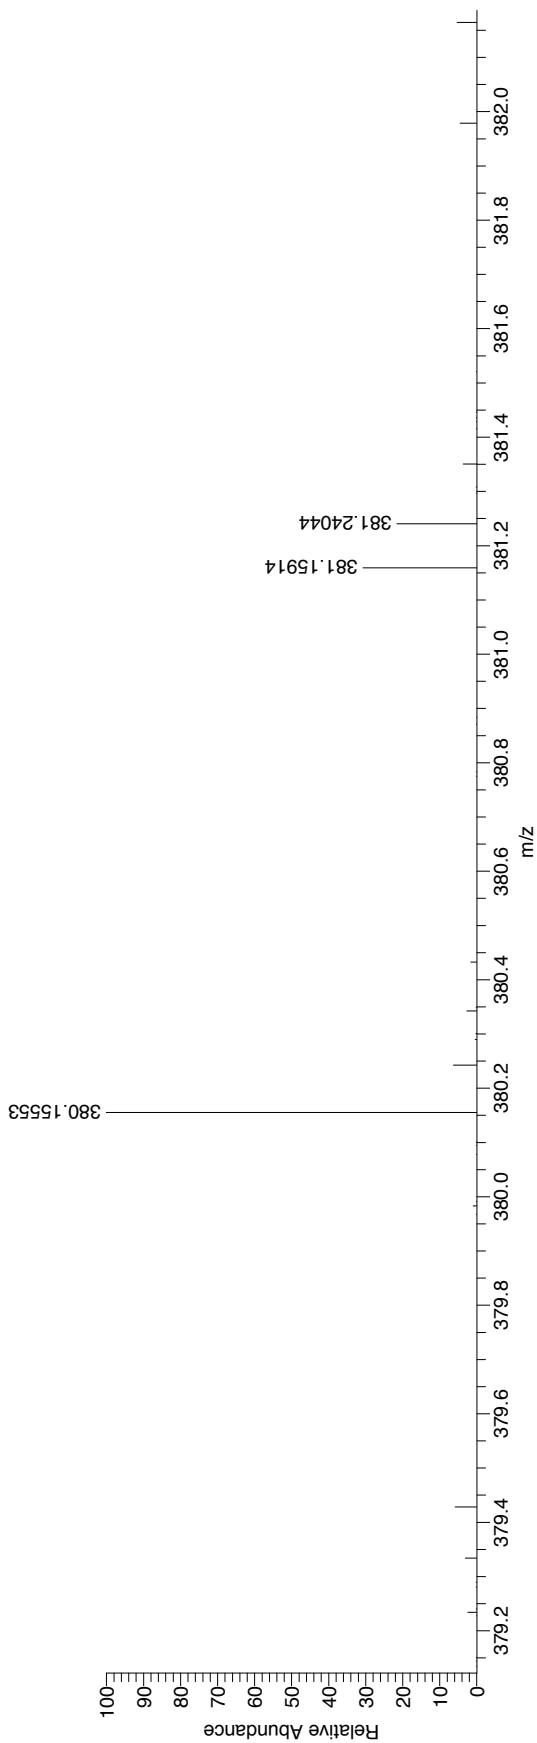

3433juhr-cmass1#1-44 RT: 0.00-4.74 AV: 44

T: + c EI Full ms [365.50-394.50]

m/z= 380.13532-380.17927

| m/z       | Intensity | Relative | Theo. Mass | Delta (ppm) | Composition                     |
|-----------|-----------|----------|------------|-------------|---------------------------------|
| 380.15553 | 57966.5   | 100.00   | 380.15595  | -1.11       | C <sub>30</sub> H <sub>20</sub> |

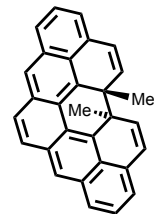

## S10. Cartesian Coordinates

o-1b, R-B3LYP/6-31G(d),  $E(\text{cc-pVTZ}) = -1155.63992744$  Hartree

|   |           |           |           |
|---|-----------|-----------|-----------|
| 6 | -0.556081 | -5.649252 | -0.156303 |
| 6 | -0.025286 | -5.089261 | -1.301318 |
| 6 | 0.383424  | -3.728901 | -1.321466 |
| 6 | 0.178510  | -2.910539 | -0.169304 |
| 6 | -0.306983 | -3.531600 | 1.028090  |
| 6 | -0.668899 | -4.881071 | 1.013331  |
| 6 | -0.306983 | -2.761175 | 2.234335  |
| 6 | -0.062772 | -1.411264 | 2.242590  |
| 6 | 0.118172  | -0.691365 | 0.978570  |
| 6 | 0.526220  | -1.513645 | -0.179493 |
| 6 | -0.118172 | 0.691365  | 0.978570  |
| 6 | 0.062772  | 1.411264  | 2.242590  |
| 6 | 0.062890  | 0.671956  | 3.483428  |
| 6 | -0.062890 | -0.671956 | 3.483428  |
| 6 | 1.043724  | -3.163298 | -2.439314 |
| 6 | 1.540806  | -1.883898 | -2.363739 |
| 6 | 1.321901  | -1.042005 | -1.245029 |
| 6 | -0.526220 | 1.513645  | -0.179493 |
| 6 | -0.178510 | 2.910539  | -0.169304 |
| 6 | 0.306983  | 3.531600  | 1.028090  |
| 6 | 0.306983  | 2.761175  | 2.234335  |
| 6 | -0.383424 | 3.728901  | -1.321466 |
| 6 | 0.025286  | 5.089261  | -1.301318 |
| 6 | 0.556081  | 5.649252  | -0.156303 |
| 6 | 0.668899  | 4.881071  | 1.013331  |
| 6 | -1.043724 | 3.163298  | -2.439314 |
| 6 | -1.540806 | 1.883898  | -2.363739 |
| 6 | -1.321901 | 1.042005  | -1.245029 |
| 6 | 2.026367  | 0.292937  | -1.270475 |
| 1 | 2.129187  | -1.489347 | -3.189089 |
| 1 | -1.205299 | 3.770190  | -3.326865 |
| 1 | -2.129187 | 1.489347  | -3.189089 |
| 6 | -2.026367 | -0.292937 | -1.270475 |
| 1 | 0.523669  | 3.267472  | 3.172631  |
| 1 | 1.026184  | 5.340273  | 1.931944  |
| 1 | 0.856878  | 6.693355  | -0.146714 |
| 1 | -0.112768 | 5.688608  | -2.197679 |
| 1 | 1.205299  | -3.770190 | -3.326865 |
| 1 | -0.135723 | -1.232451 | 4.412211  |
| 1 | 0.135723  | 1.232451  | 4.412211  |
| 1 | -0.523669 | -3.267472 | 3.172631  |
| 1 | -1.026184 | -5.340273 | 1.931944  |
| 1 | -0.856878 | -6.693355 | -0.146714 |
| 1 | 0.112768  | -5.688608 | -2.197679 |
| 1 | 3.001159  | 0.178048  | -1.758504 |
| 1 | 1.468073  | 1.048480  | -1.834308 |
| 1 | 2.189314  | 0.692847  | -0.267068 |
| 1 | -3.001159 | -0.178048 | -1.758504 |
| 1 | -1.468073 | -1.048480 | -1.834308 |
| 1 | -2.189314 | -0.692847 | -0.267068 |

**c-1b**, R-B3LYP/6-31G(d),  $E(\text{cc-pVTZ}) = -1155.65181526$  Hartree

|   |           |           |           |
|---|-----------|-----------|-----------|
| 6 | -0.000473 | 5.676363  | -0.057713 |
| 6 | -0.023311 | 4.980010  | -1.290816 |
| 6 | -0.070510 | 3.599113  | -1.329471 |
| 6 | -0.096447 | 2.852018  | -0.102755 |
| 6 | -0.029684 | 3.560234  | 1.143918  |
| 6 | 0.002750  | 4.986000  | 1.129823  |
| 6 | -0.006082 | 2.824109  | 2.341781  |
| 6 | 0.006082  | 1.433863  | 2.336749  |
| 6 | -0.027631 | 0.728831  | 1.086550  |
| 6 | -0.139828 | 1.437055  | -0.114125 |
| 6 | 0.027631  | -0.728831 | 1.086550  |
| 6 | -0.006082 | -1.433863 | 2.336749  |
| 6 | -0.014751 | -0.677203 | 3.567517  |
| 6 | 0.014751  | 0.677203  | 3.567517  |
| 6 | 0.139828  | -1.437055 | -0.114125 |
| 6 | 0.418101  | -0.667253 | -1.409414 |
| 6 | -0.418101 | 0.667253  | -1.409414 |
| 6 | -0.140471 | 1.522510  | -2.627730 |
| 6 | -0.037725 | 2.858469  | -2.583473 |
| 6 | 0.096447  | -2.852018 | -0.102755 |
| 6 | 0.029684  | -3.560234 | 1.143918  |
| 6 | 0.006082  | -2.824109 | 2.341781  |
| 6 | 0.070510  | -3.599113 | -1.329471 |
| 6 | 0.023311  | -4.980010 | -1.290816 |
| 6 | 0.000473  | -5.676363 | -0.057713 |
| 6 | -0.002750 | -4.986000 | 1.129823  |
| 6 | 0.037725  | -2.858469 | -2.583473 |
| 6 | 0.140471  | -1.522510 | -2.627730 |
| 6 | -1.945456 | 0.337759  | -1.445261 |
| 1 | -0.127465 | 1.025206  | -3.593636 |
| 1 | -0.082697 | -3.430277 | -3.501578 |
| 1 | 0.127465  | -1.025206 | -3.593636 |
| 6 | 1.945456  | -0.337759 | -1.445261 |
| 1 | -0.008116 | -3.355601 | 3.291068  |
| 1 | -0.036979 | -5.515374 | 2.078876  |
| 1 | -0.028986 | -6.762613 | -0.058283 |
| 1 | -0.006741 | -5.538667 | -2.223336 |
| 1 | 0.082697  | 3.430277  | -3.501578 |
| 1 | 0.026675  | 1.228958  | 4.504442  |
| 1 | -0.026675 | -1.228958 | 4.504442  |
| 1 | 0.008116  | 3.355601  | 3.291068  |
| 1 | 0.036979  | 5.515374  | 2.078876  |
| 1 | 0.028986  | 6.762613  | -0.058283 |
| 1 | 0.006741  | 5.538667  | -2.223336 |
| 1 | -2.203136 | -0.197685 | -2.365520 |
| 1 | -2.234259 | -0.286832 | -0.594615 |
| 1 | -2.525377 | 1.264372  | -1.410901 |
| 1 | 2.203136  | 0.197685  | -2.365520 |
| 1 | 2.234259  | 0.286832  | -0.594615 |
| 1 | 2.525377  | -1.264372 | -1.410901 |



TS[o-1b → c-1b], BS-B3LYP/6-31G(d),  $E(\text{cc-pVTZ}) = -1155.59824467$  Hartree

|   |           |           |           |
|---|-----------|-----------|-----------|
| 6 | -0.004475 | 5.661569  | -0.115784 |
| 6 | -0.166808 | 4.969858  | -1.331856 |
| 6 | -0.326555 | 3.583182  | -1.355529 |
| 6 | -0.297894 | 2.846521  | -0.121865 |
| 6 | -0.103679 | 3.556959  | 1.113113  |
| 6 | 0.022166  | 4.976394  | 1.081455  |
| 6 | -0.064526 | 2.827018  | 2.312658  |
| 6 | -0.055761 | 1.427124  | 2.312111  |
| 6 | -0.130051 | 0.716123  | 1.074518  |
| 6 | -0.439154 | 1.432968  | -0.119769 |
| 6 | 0.130051  | -0.716123 | 1.074518  |
| 6 | 0.055761  | -1.427124 | 2.312111  |
| 6 | -0.004475 | -0.678646 | 3.543330  |
| 6 | 0.004475  | 0.678646  | 3.543330  |
| 6 | -0.505896 | 2.850006  | -2.579615 |
| 6 | -0.793989 | 1.514777  | -2.563813 |
| 6 | -0.861307 | 0.748759  | -1.351508 |
| 6 | 0.439154  | -1.432968 | -0.119769 |
| 6 | 0.297894  | -2.846521 | -0.121865 |
| 6 | 0.103679  | -3.556959 | 1.113113  |
| 6 | 0.064526  | -2.827018 | 2.312658  |
| 6 | 0.326555  | -3.583182 | -1.355529 |
| 6 | 0.166808  | -4.969858 | -1.331856 |
| 6 | 0.004475  | -5.661569 | -0.115784 |
| 6 | -0.022166 | -4.976394 | 1.081455  |
| 6 | 0.505896  | -2.850006 | -2.579615 |
| 6 | 0.793989  | -1.514777 | -2.563813 |
| 6 | 0.861307  | -0.748759 | -1.351508 |
| 6 | -2.004464 | -0.253744 | -1.304456 |
| 1 | -1.052949 | 1.010333  | -3.493070 |
| 1 | 0.482734  | -3.397799 | -3.518950 |
| 1 | 1.052949  | -1.010333 | -3.493070 |
| 6 | 2.004464  | 0.253744  | -1.304456 |
| 1 | 0.003900  | -3.359382 | 3.259360  |
| 1 | -0.153870 | -5.508596 | 2.020187  |
| 1 | -0.105721 | -6.742615 | -0.125633 |
| 1 | 0.171056  | -5.519208 | -2.270117 |
| 1 | -0.482734 | 3.397799  | -3.518950 |
| 1 | 0.017912  | 1.232347  | 4.479010  |
| 1 | -0.017912 | -1.232347 | 4.479010  |
| 1 | -0.003900 | 3.359382  | 3.259360  |
| 1 | 0.153870  | 5.508596  | 2.020187  |
| 1 | 0.105721  | 6.742615  | -0.125633 |
| 1 | -0.171056 | 5.519208  | -2.270117 |
| 1 | 1.988579  | 0.903414  | -2.186503 |
| 1 | 1.990330  | 0.881984  | -0.413638 |
| 1 | 2.958049  | -0.291512 | -1.308596 |
| 1 | -1.988579 | -0.903414 | -2.186503 |
| 1 | -1.990330 | -0.881984 | -0.413638 |
| 1 | -2.958049 | 0.291512  | -1.308596 |

<sup>3</sup>o-1b, U-B3LYP/6-31G(d),  $E(\text{cc-pVTZ}) = -1155.62123671$  Hartree

|   |           |           |           |
|---|-----------|-----------|-----------|
| 6 | 0.006251  | 5.696243  | -0.148918 |
| 6 | -0.428126 | 5.060835  | -1.310356 |
| 6 | -0.681215 | 3.664637  | -1.327742 |
| 6 | -0.428126 | 2.882835  | -0.155852 |
| 6 | -0.022708 | 3.561999  | 1.046878  |
| 6 | 0.188492  | 4.968526  | 1.019913  |
| 6 | 0.072197  | 2.820096  | 2.231435  |
| 6 | -0.008917 | 1.412412  | 2.227405  |
| 6 | -0.154332 | 0.708241  | 0.992638  |
| 6 | -0.626485 | 1.462116  | -0.160818 |
| 6 | 0.154332  | -0.708241 | 0.992638  |
| 6 | 0.008917  | -1.412412 | 2.227405  |
| 6 | -0.047695 | -0.678909 | 3.456918  |
| 6 | 0.047695  | 0.678909  | 3.456918  |
| 6 | -1.214141 | 3.016451  | -2.465790 |
| 6 | -1.587874 | 1.686694  | -2.390827 |
| 6 | -1.351836 | 0.893270  | -1.255430 |
| 6 | 0.626485  | -1.462116 | -0.160818 |
| 6 | 0.428126  | -2.882835 | -0.155852 |
| 6 | 0.022708  | -3.561999 | 1.046878  |
| 6 | -0.072197 | -2.820096 | 2.231435  |
| 6 | 0.681215  | -3.664637 | -1.327742 |
| 6 | 0.428126  | -5.060835 | -1.310356 |
| 6 | -0.006251 | -5.696243 | -0.148918 |
| 6 | -0.188492 | -4.968526 | 1.019913  |
| 6 | 1.214141  | -3.016451 | -2.465790 |
| 6 | 1.587874  | -1.686694 | -2.390827 |
| 6 | 1.351836  | -0.893270 | -1.255430 |
| 6 | -2.013709 | -0.467881 | -1.230954 |
| 1 | -2.112967 | 1.235664  | -3.230182 |
| 1 | 1.400548  | -3.592255 | -3.368885 |
| 1 | 2.112967  | -1.235664 | -3.230182 |
| 6 | 2.013709  | 0.467881  | -1.230954 |
| 1 | -0.238101 | -3.334930 | 3.174957  |
| 1 | -0.492515 | -5.466243 | 1.937116  |
| 1 | -0.184534 | -6.768252 | -0.153043 |
| 1 | 0.599040  | -5.633042 | -2.218569 |
| 1 | -1.400548 | 3.592255  | -3.368885 |
| 1 | 0.107011  | 1.235710  | 4.388753  |
| 1 | -0.107011 | -1.235710 | 4.388753  |
| 1 | 0.238101  | 3.334930  | 3.174957  |
| 1 | 0.492515  | 5.466243  | 1.937116  |
| 1 | 0.184534  | 6.768252  | -0.153043 |
| 1 | -0.599040 | 5.633042  | -2.218569 |
| 1 | -2.994742 | -0.393996 | -1.714681 |
| 1 | -1.443496 | -1.230558 | -1.772141 |
| 1 | -2.169420 | -0.833965 | -0.214321 |
| 1 | 2.994742  | 0.393996  | -1.714681 |
| 1 | 1.443496  | 1.230558  | -1.772141 |
| 1 | 2.169420  | 0.833965  | -0.214321 |

<sup>3</sup>c-1b, U-B3LYP/6-31G(d),  $E(\text{cc-pVTZ}) = -1155.58396623$  Hartree

|   |           |           |           |
|---|-----------|-----------|-----------|
| 6 | 5.666429  | -0.103969 | 0.101709  |
| 6 | 4.962359  | -1.329408 | 0.044706  |
| 6 | 3.582077  | -1.357206 | -0.040457 |
| 6 | 2.840521  | -0.120984 | -0.063870 |
| 6 | 3.564152  | 1.123341  | 0.026620  |
| 6 | 4.984180  | 1.092188  | 0.094983  |
| 6 | 2.843575  | 2.331631  | 0.029723  |
| 6 | 1.454081  | 2.350486  | 0.009937  |
| 6 | 0.724757  | 1.102124  | -0.034044 |
| 6 | 1.437636  | -0.121024 | -0.150587 |
| 6 | -0.698093 | 1.117658  | 0.041519  |
| 6 | -1.398505 | 2.351834  | 0.007486  |
| 6 | -0.649195 | 3.579187  | -0.002585 |
| 6 | 0.712021  | 3.578964  | 0.022137  |
| 6 | -1.447285 | -0.119619 | 0.156760  |
| 6 | -0.678333 | -1.394273 | 0.450303  |
| 6 | 0.658567  | -1.396300 | -0.440501 |
| 6 | 1.497948  | -2.627695 | -0.212025 |
| 6 | 2.833932  | -2.600404 | -0.069288 |
| 6 | -2.842104 | -0.109210 | 0.057317  |
| 6 | -3.555203 | 1.146672  | -0.038284 |
| 6 | -2.804954 | 2.349430  | -0.020524 |
| 6 | -3.594716 | -1.336395 | 0.033039  |
| 6 | -5.028799 | -1.287940 | -0.066612 |
| 6 | -5.686309 | -0.090834 | -0.140300 |
| 6 | -4.952355 | 1.135217  | -0.125675 |
| 6 | -2.883612 | -2.564334 | 0.076090  |
| 6 | -1.527757 | -2.612962 | 0.230461  |
| 6 | 0.251772  | -1.408116 | -1.945353 |
| 1 | 0.991513  | -3.587555 | -0.267919 |
| 1 | -3.448240 | -3.491602 | -0.002648 |
| 1 | -1.043904 | -3.581506 | 0.319279  |
| 6 | -0.258815 | -1.406402 | 1.959876  |
| 1 | -3.334704 | 3.298607  | -0.060194 |
| 1 | -5.485579 | 2.080710  | -0.180030 |
| 1 | -6.769826 | -0.060383 | -0.211003 |
| 1 | -5.578282 | -2.226008 | -0.080592 |
| 1 | 3.394223  | -3.529012 | 0.021245  |
| 1 | 1.264713  | 4.515089  | 0.041703  |
| 1 | -1.199692 | 4.516902  | -0.011796 |
| 1 | 3.389196  | 3.272621  | 0.057992  |
| 1 | 5.522979  | 2.035091  | 0.148777  |
| 1 | 6.751343  | -0.112650 | 0.159995  |
| 1 | 5.512620  | -2.267047 | 0.072921  |
| 1 | -0.317359 | -2.316739 | -2.172814 |
| 1 | -0.370554 | -0.542774 | -2.192298 |
| 1 | 1.144797  | -1.388469 | -2.577136 |
| 1 | 0.287921  | -2.327972 | 2.187617  |
| 1 | 0.388291  | -0.556347 | 2.195213  |
| 1 | -1.147287 | -1.360892 | 2.596305  |
